# Supplementary material for: Site-specific orthometallation via C–H bond activation and syntheses of ruthenium(iii) organometallics: studies on nitric oxide (NO) reactivity and photorelease of coordinated NO
Source: Royal Society of Chemistry journal article supplement (doi:10.1039/c6ra17223g), 2016-01-01
Supplement: c6ra17223g1.pdf [file c6ra17223g1.pdf]

## Supporting information

# **Site-specific orthometallation *via* C–H bond activation and syntheses of ruthenium (III) organometallics: Studies on nitric oxide (NO) reactivity and photorelease of coordinated NO**

*Rajan Kumar, Sushil Kumar, Manju Bala, Anand Ratnam U. P. Singh, and Kaushik Ghosh,\**

*Department of Chemistry, Indian Institute of Technology, Roorkee, Roorkee-247667,  
Uttarakhand, INDIA*

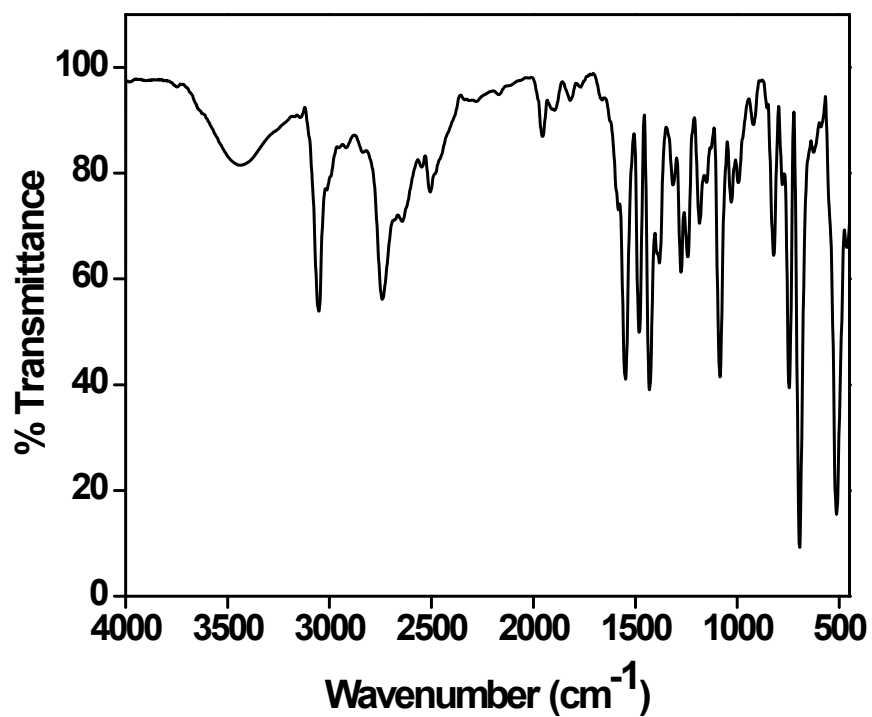

**Figure S1.** Infrared spectrum of complex **1**. IR (KBr disk,  $\text{cm}^{-1}$ ): 1558 ( $\nu_{\text{CONH}}$ ), 746, 692, 520 ( $\nu_{\text{PPh}_3}$ )  $\text{cm}^{-1}$ .

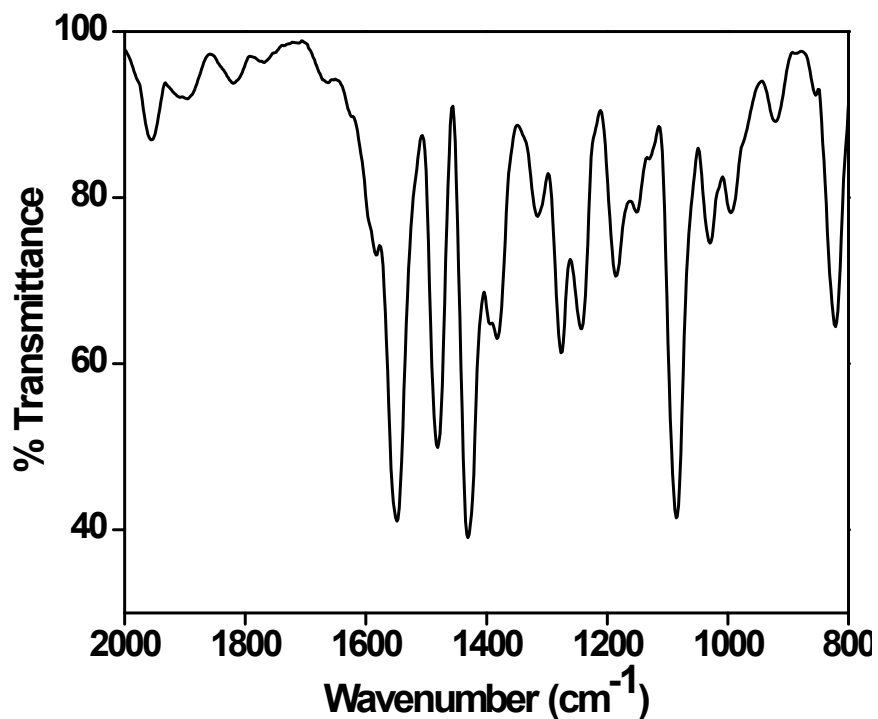

**Figure S2.** Magnified infrared spectrum of complex **1** in the CO stretching region. IR (KBr disk,  $\text{cm}^{-1}$ ): 1558 ( $\nu_{\text{CONH}}$ )  $\text{cm}^{-1}$ .

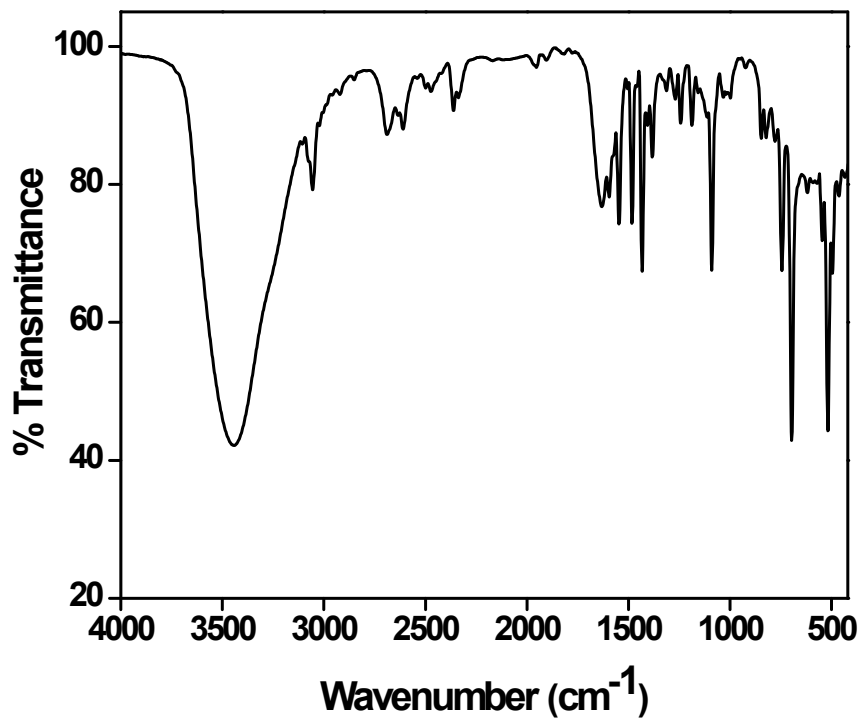

**Figure S3.** Infrared spectrum of complex **2**. IR (KBr disk,  $\text{cm}^{-1}$ ): 1635 ( $\nu_{\text{CONH}}$ ), 746, 694, 522 ( $\nu_{\text{PPh}_3}$ )  $\text{cm}^{-1}$ .

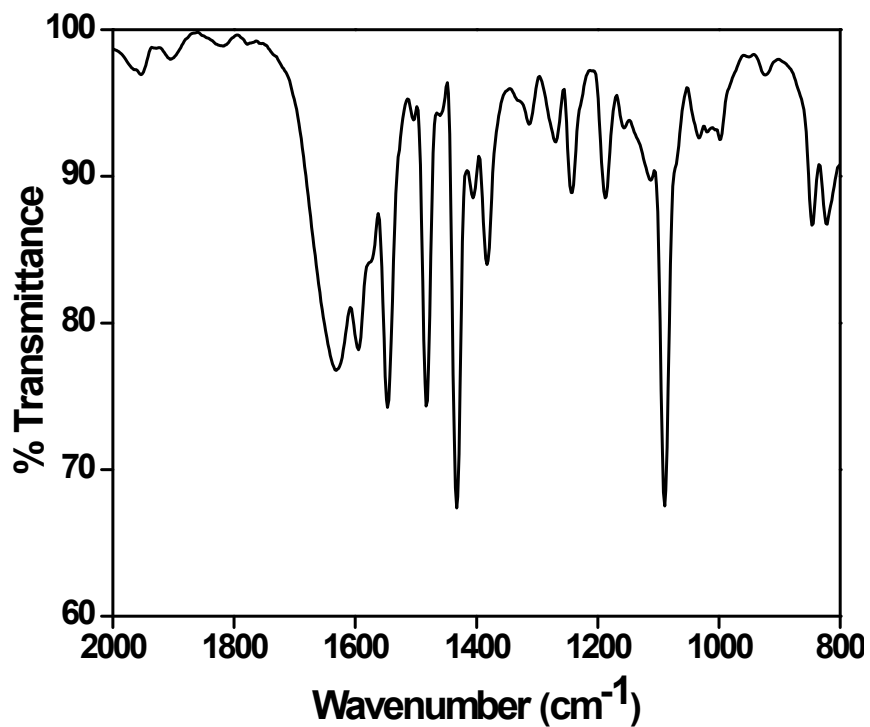

**Figure S4.** Magnified infrared spectrum of complex **2** in the CO stretching region. IR (KBr disk,  $\text{cm}^{-1}$ ): 1635 ( $\nu_{\text{CONH}}$ )  $\text{cm}^{-1}$ .

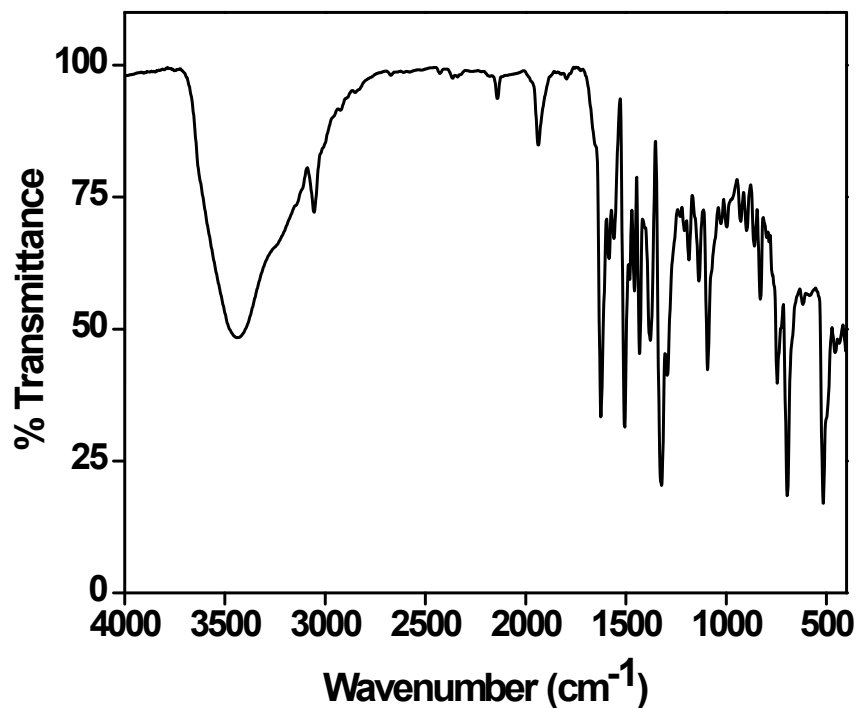

**Figure S5.** Infrared spectrum of complex **3**. IR (KBr disk, cm<sup>-1</sup>): 1632 ( $\nu_{\text{CONH}}$ ), 744, 694, 515 ( $\nu_{\text{PPh}_3}$ ) cm<sup>-1</sup>.

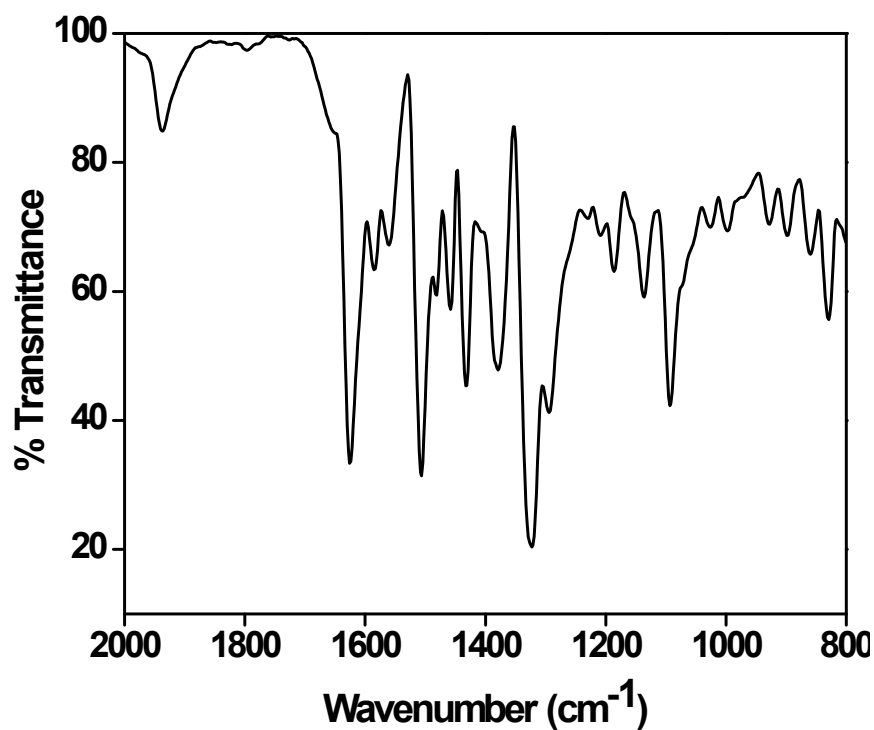

**Figure S6.** Magnified infrared spectrum of complex **3** in the CO stretching region. IR (KBr disk, cm<sup>-1</sup>): 1632 ( $\nu_{\text{CONH}}$ ) cm<sup>-1</sup>.

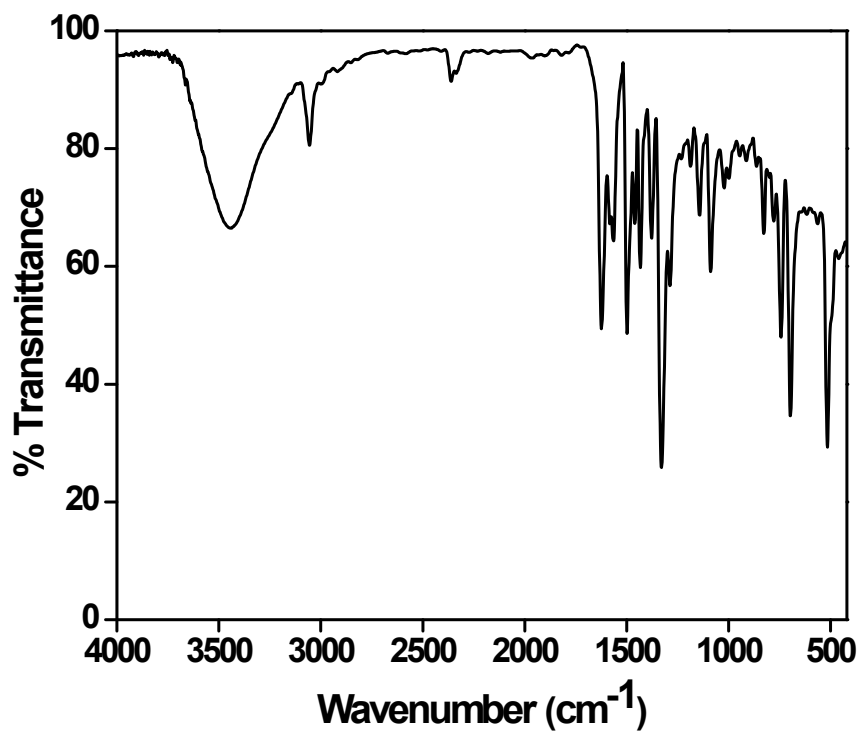

**Figure S7.** Infrared spectrum of complex 4. IR (KBr disk,  $\text{cm}^{-1}$ ): 1625 ( $\nu_{\text{CONH}}$ ), 742, 692, 514 ( $\nu_{\text{PPh}_3}$ )  $\text{cm}^{-1}$ .

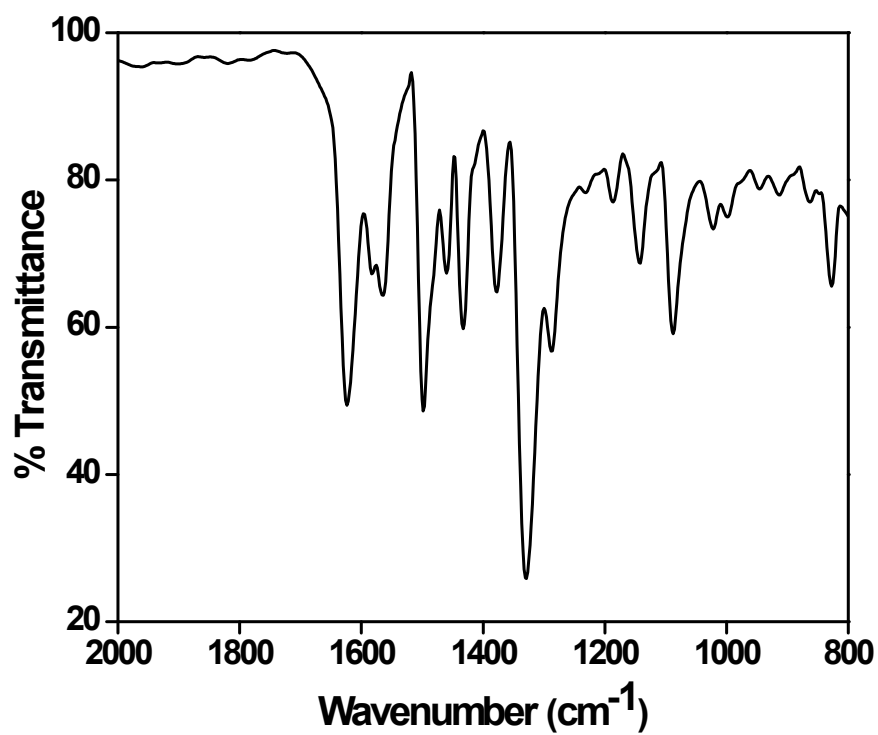

**Figure S8.** Magnified infrared spectrum of complex 4 in the CO stretching region. IR (KBr disk,  $\text{cm}^{-1}$ ): 1625 ( $\nu_{\text{CONH}}$ )  $\text{cm}^{-1}$ .

**Table S1.** Data for IR spectral studies.

| Complex   | IR data (cm <sup>-1</sup> , KBr pellets) |                   |                      |                      |
|-----------|------------------------------------------|-------------------|----------------------|----------------------|
|           | $\nu_{\text{CONH}}$                      | $\nu_{\text{NO}}$ | $\nu_{\text{ClO}_4}$ | $\nu_{\text{PPh}_3}$ |
| <b>1</b>  | 1558                                     | –                 | –                    | 746, 692, 520        |
| <b>2</b>  | 1635                                     | –                 | –                    | 746, 694, 522        |
| <b>3</b>  | 1632                                     | –                 | –                    | 744, 694, 515        |
| <b>4</b>  | 1625                                     | –                 | –                    | 742, 692, 514        |
| <b>1a</b> | 1635                                     | 1880              | 1092, 620            | 730, 692, 530        |
| <b>2a</b> | 1585                                     | 1870              | 1092, 612            | 746, 692, 522        |
| <b>3a</b> | 1645                                     | 1830              | 1092, 612            | 746, 694, 520        |
| <b>4a</b> | 1655                                     | 1845              | 1090, 614            | 742, 692, 514        |

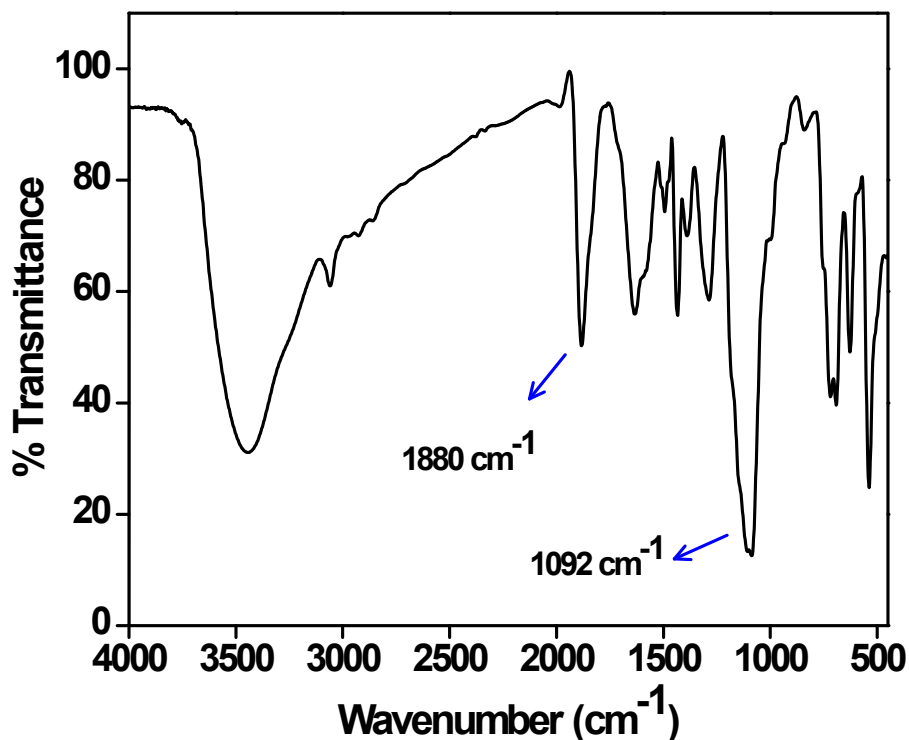

**Figure S9.** Infrared spectrum of complex **1a**. IR (KBr disk, cm<sup>-1</sup>): 1880 ( $\nu_{\text{NO}}$ ), 1635 ( $\nu_{\text{CONH}}$ ), 1092, 620 ( $\nu_{\text{ClO}_4}$ ), 730, 692, 530 ( $\nu_{\text{PPh}_3}$ ) cm<sup>-1</sup>.

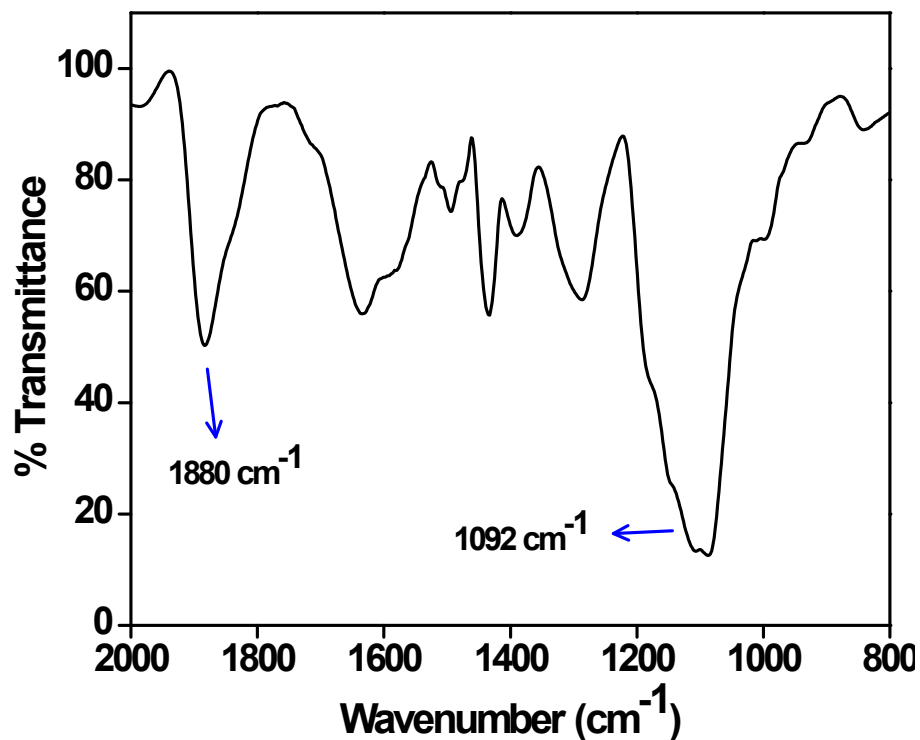

**Figure S10.** Magnified infrared spectrum of complex **1a** in the CO stretching region. IR (KBr disk,  $\text{cm}^{-1}$ ): 1880 ( $\nu_{\text{NO}}$ ), 1635 ( $\nu_{\text{CONH}}$ ), 1092, 620 ( $\nu_{\text{ClO}_4}$ )  $\text{cm}^{-1}$ .

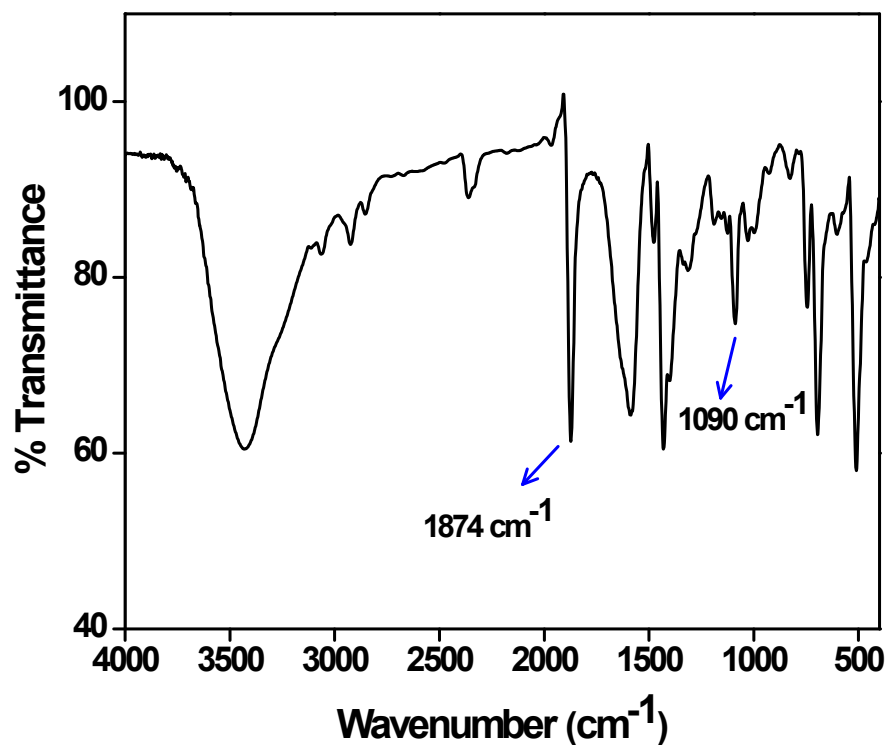

**Figure S11.** Infrared spectrum of complex **2a**. IR (KBr disk,  $\text{cm}^{-1}$ ): 1874 ( $\nu_{\text{NO}}$ ), 1590 ( $\nu_{\text{CONH}}$ ), 1090, 608 ( $\nu_{\text{ClO}_4}$ ), 748, 698, 512 ( $\nu_{\text{PPh}_3}$ )  $\text{cm}^{-1}$ .

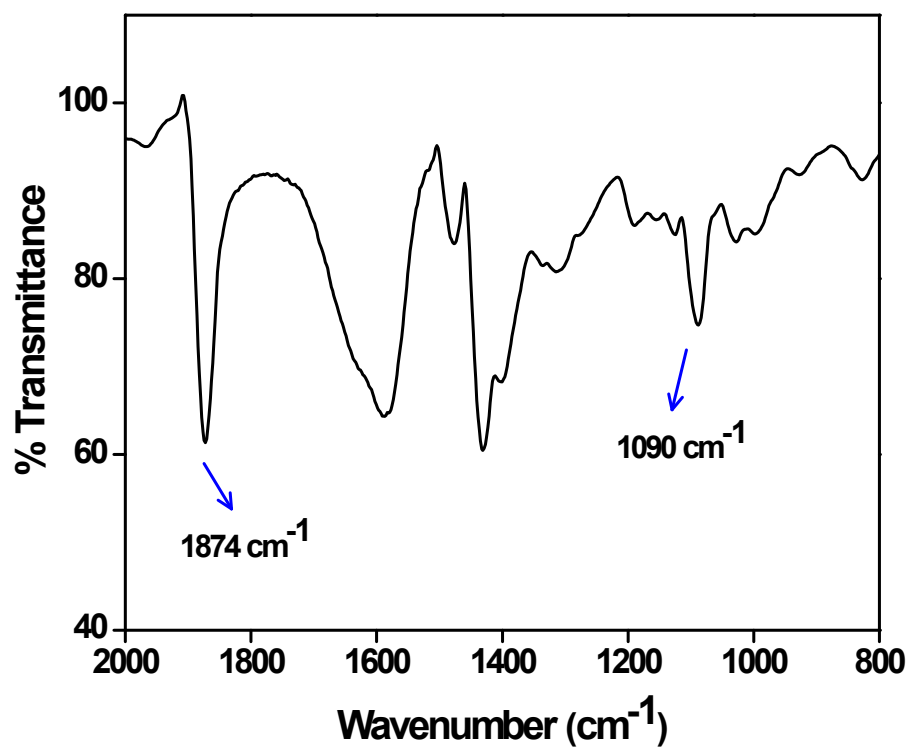

**Figure S12.** Magnified infrared spectrum of complex **2a** in the CO stretching region. IR (KBr disk,  $\text{cm}^{-1}$ ): 1874 ( $\nu_{\text{NO}}$ ), 1590 ( $\nu_{\text{CONH}}$ ), 1090, 608 ( $\nu_{\text{ClO}_4}$ )  $\text{cm}^{-1}$ .

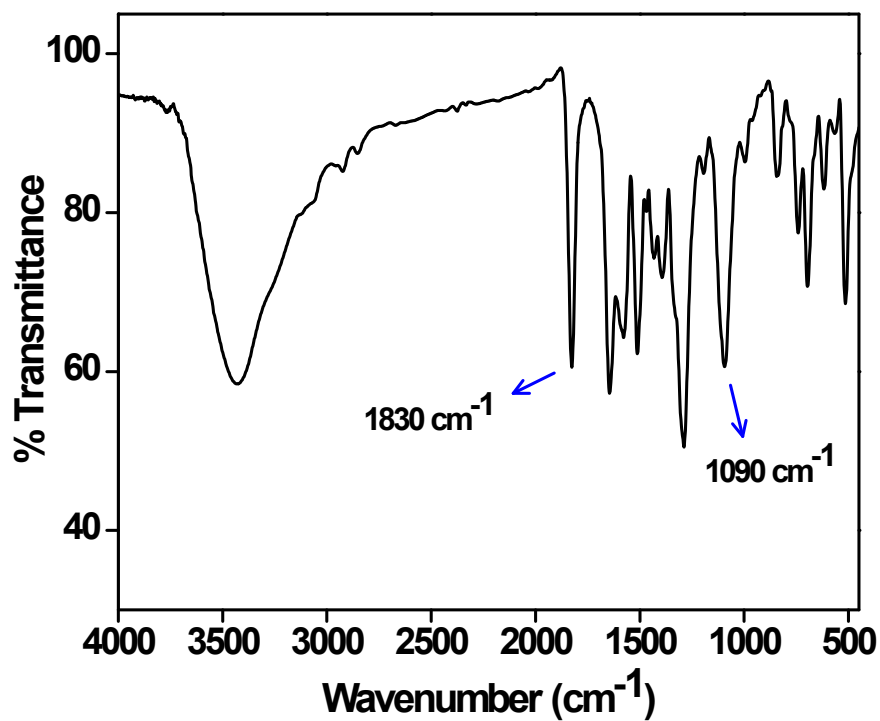

**Figure S13.** Infrared spectrum of complex **3a**. IR (KBr disk,  $\text{cm}^{-1}$ ): 1830 ( $\nu_{\text{NO}}$ ), 1645 ( $\nu_{\text{CONH}}$ ), 1090, 620 ( $\nu_{\text{ClO}_4}$ ), 746, 692, 520 ( $\nu_{\text{PPh}_3}$ )  $\text{cm}^{-1}$ .



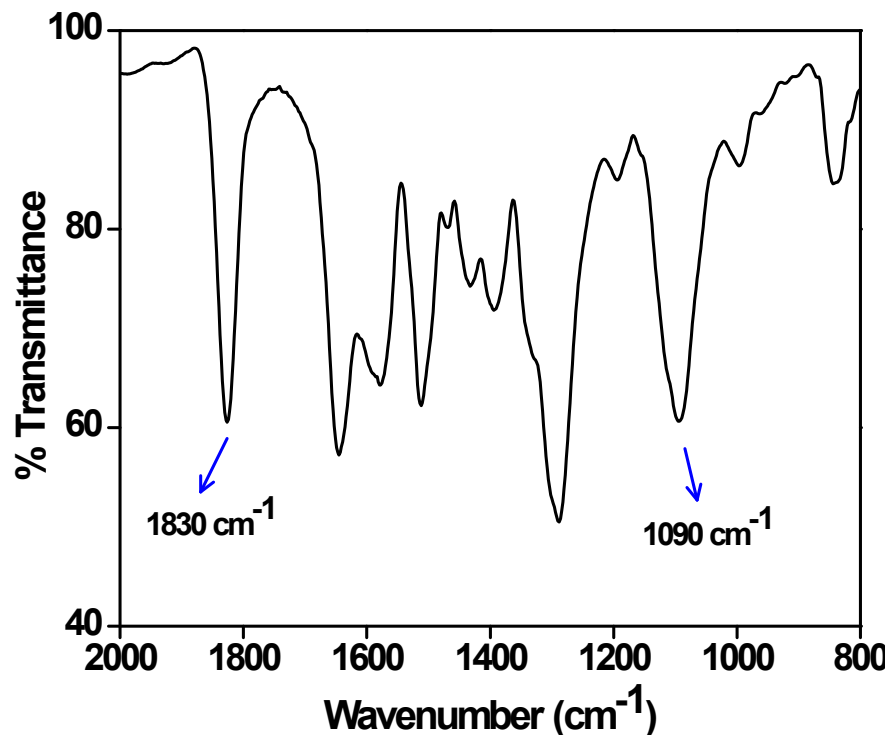

**Figure S14.** Magnified infrared spectrum of complex **3a** in the CO stretching region. IR (KBr disk,  $\text{cm}^{-1}$ ): 1830 ( $\nu_{\text{NO}}$ ), 1645 ( $\nu_{\text{CONH}}$ ), 1090, 620 ( $\nu_{\text{ClO}_4}$ )  $\text{cm}^{-1}$ .

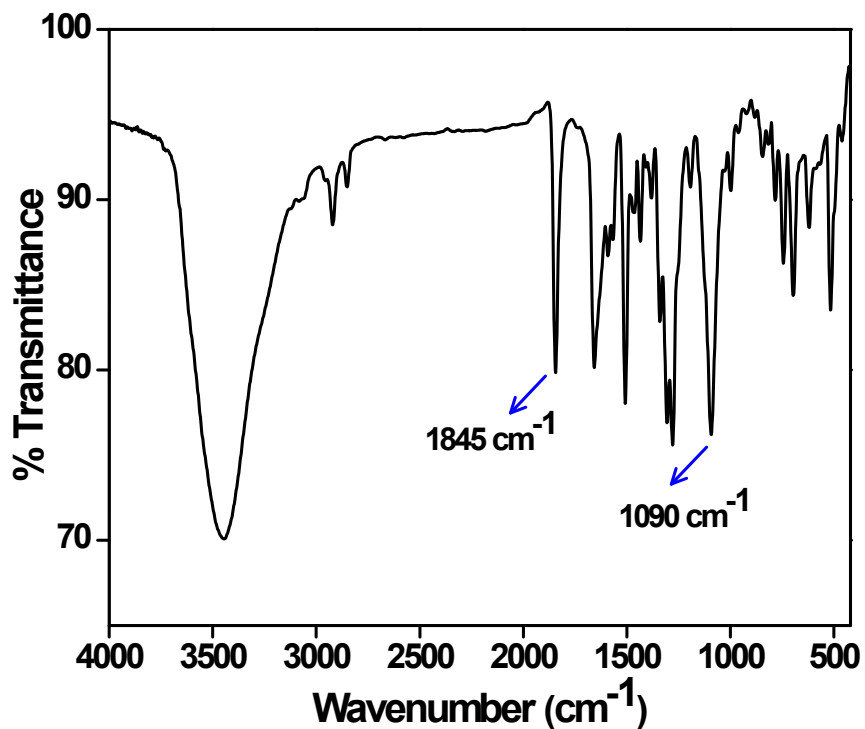

**Figure S15.** Infrared spectrum of complex **4a**. IR (KBr disk,  $\text{cm}^{-1}$ ): 1845 ( $\nu_{\text{NO}}$ ), 1655 ( $\nu_{\text{CONH}}$ ), 1090, 614 ( $\nu_{\text{ClO}_4}$ ), 742, 692, 514 ( $\nu_{\text{PPh}_3}$ )  $\text{cm}^{-1}$ .

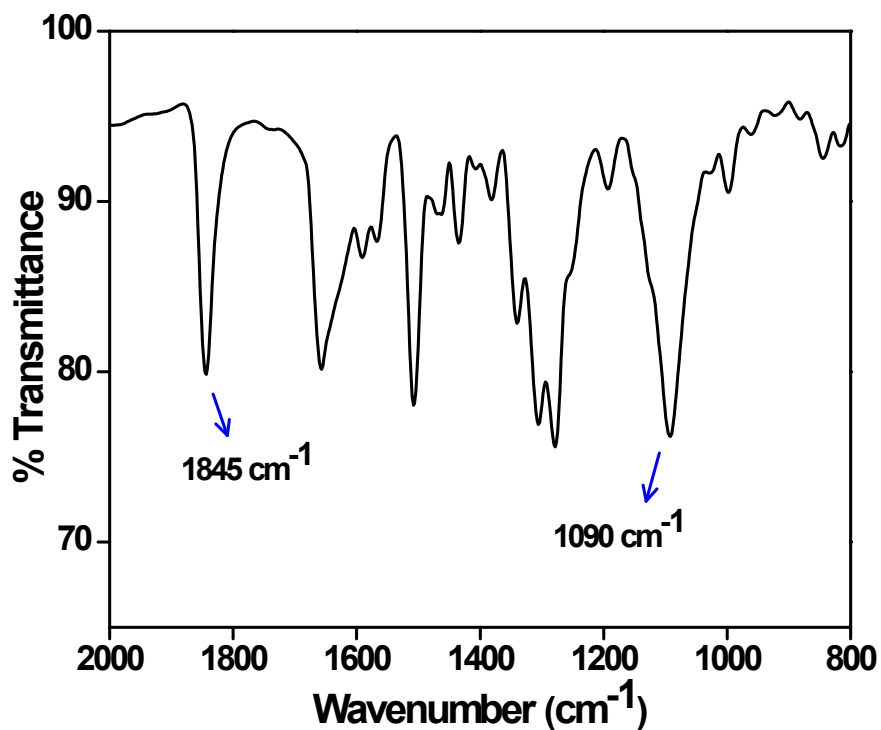

**Figure S16.** Magnified infrared spectrum of complex **4a** in the CO stretching region. IR (KBr disk, cm<sup>-1</sup>): 1845 ( $\nu_{\text{NO}}$ ), 1655 ( $\nu_{\text{CONH}}$ ), 1090, 614 ( $\nu_{\text{ClO}_4}$ ) cm<sup>-1</sup>.

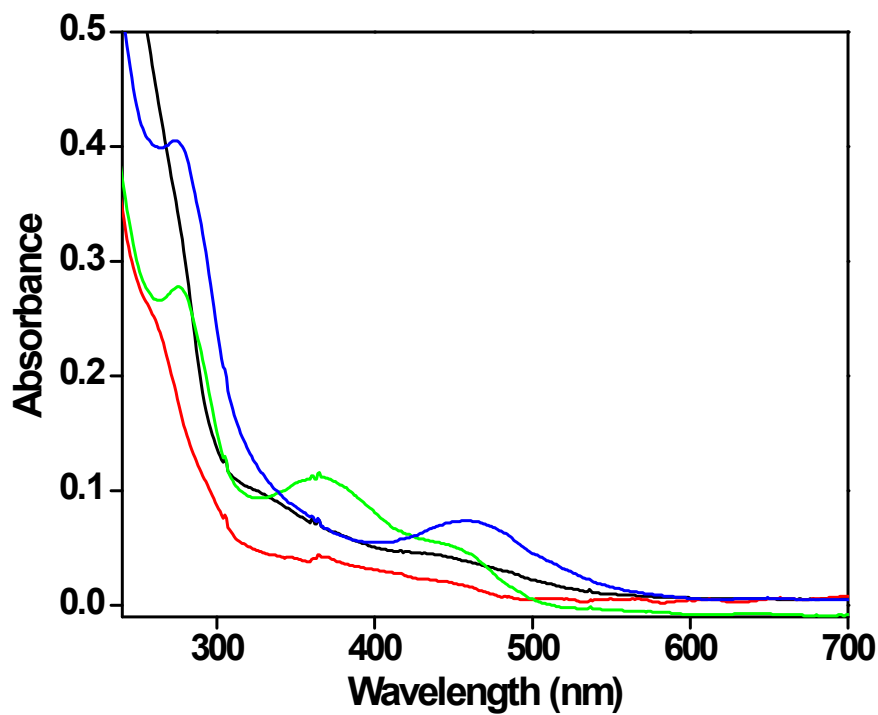

**Figure S17.** Electronic absorption spectra of complexes **1** (—), **2** (—), **3** (—) and **4** (—) in dichloromethane solutions.

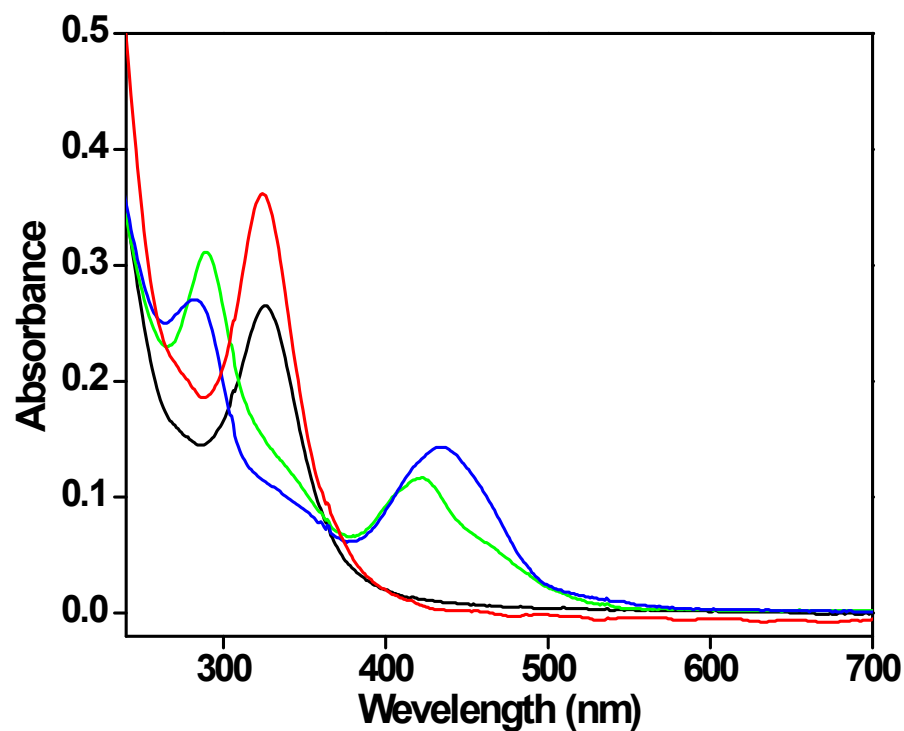

**Figure S18.** Electronic absorption spectra of ruthenium nitrosyl complexes **1a** (—), **2a** (—), **3a** (—) and **4a** (—) in dichloromethane solutions.

**Table S2.** Electronic spectral data for ruthenium complexes in dichloromethane solutions.

| Complex   | $\lambda_{\text{max}}/\text{nm}$ ( $\epsilon / \text{M}^{-1}\text{cm}^{-1}$ ) |
|-----------|-------------------------------------------------------------------------------|
| <b>1</b>  | 270 (17280), 335 (4041), 445 (1942)                                           |
| <b>2</b>  | 262 (17596), 365 (2804)                                                       |
| <b>3</b>  | 274 (28626), 460 (5042)                                                       |
| <b>4</b>  | 274 (25615), 365 (10570), 460 (4966)                                          |
| <b>1a</b> | 326 (21370)                                                                   |
| <b>2a</b> | 324 (29668)                                                                   |
| <b>3a</b> | 282 (27107), 434 (20867)                                                      |
| <b>4a</b> | 288 (30266), 424 (14372)                                                      |

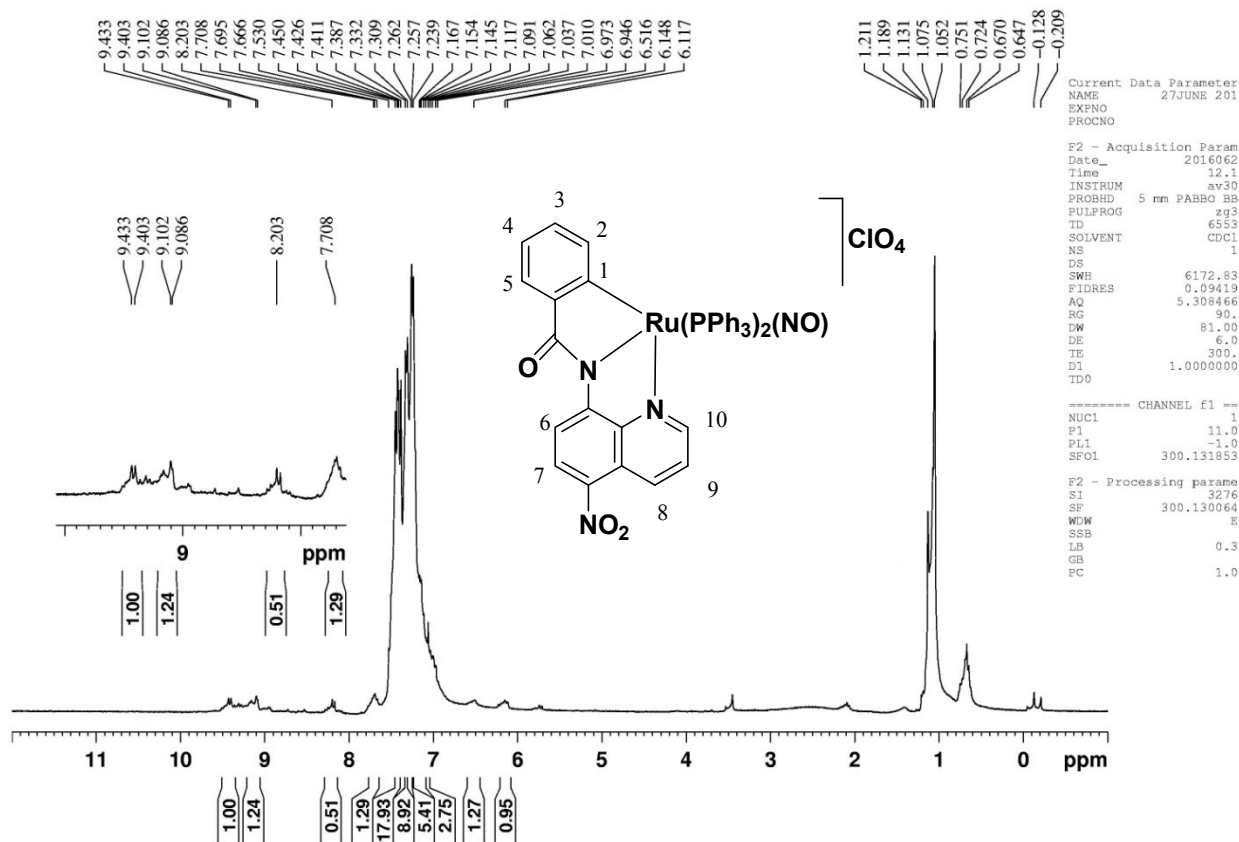

Figure S19. <sup>1</sup>H NMR spectrum of complex **1a** in CDCl<sub>3</sub> at room temperature.

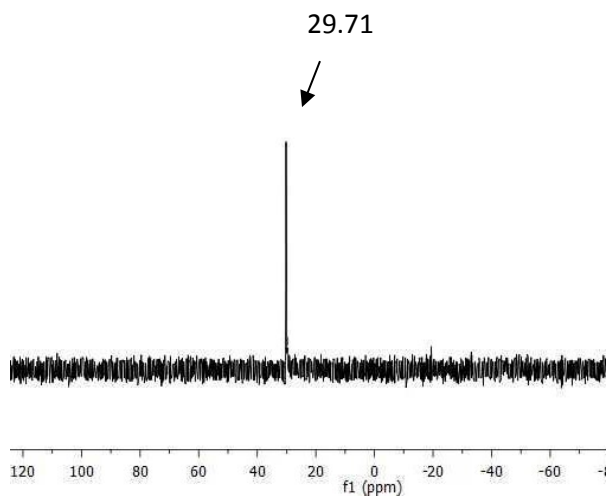

Figure S20. <sup>31</sup>P NMR spectrum of complex **1a** in CDCl<sub>3</sub> at room temperature.

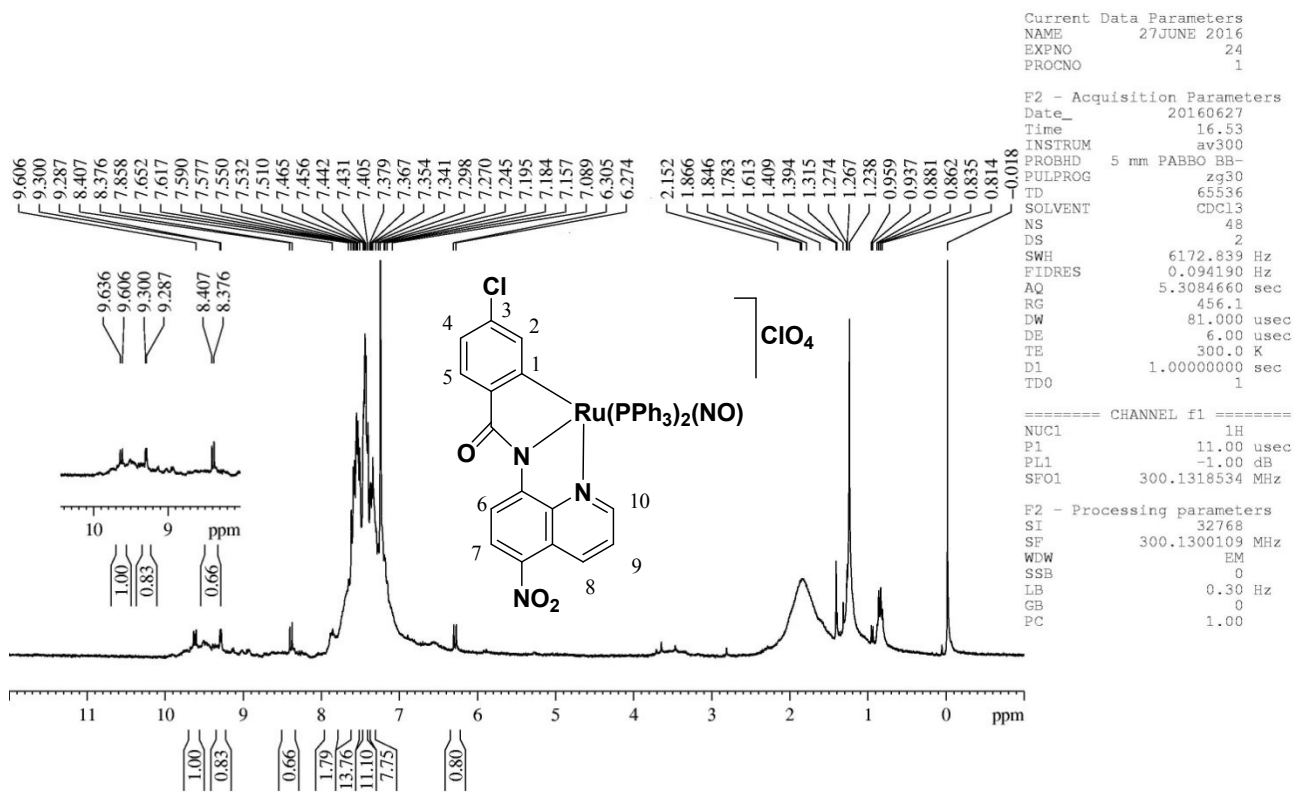

Figure S21.  $^1\text{H}$  NMR spectrum of complex **2a** in  $\text{CDCl}_3$  at room temperature.

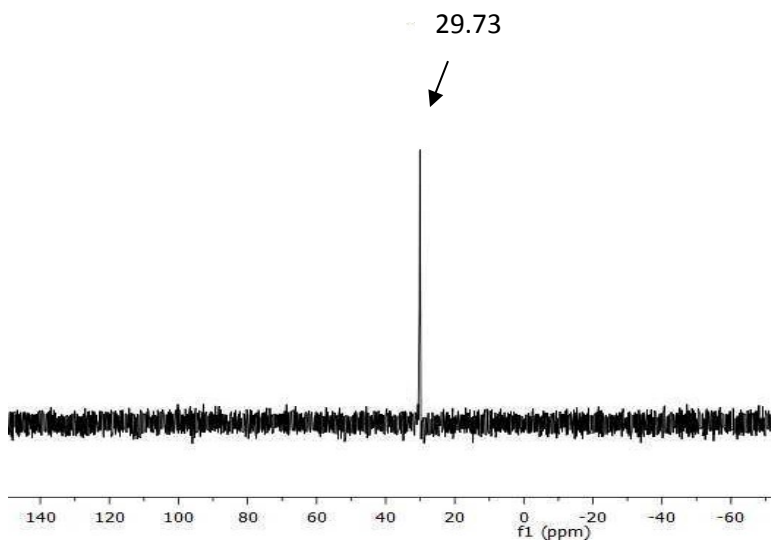

Figure S22.  $^{31}\text{P}$  NMR spectrum of complex **2a** in  $\text{CDCl}_3$  at room temperature.

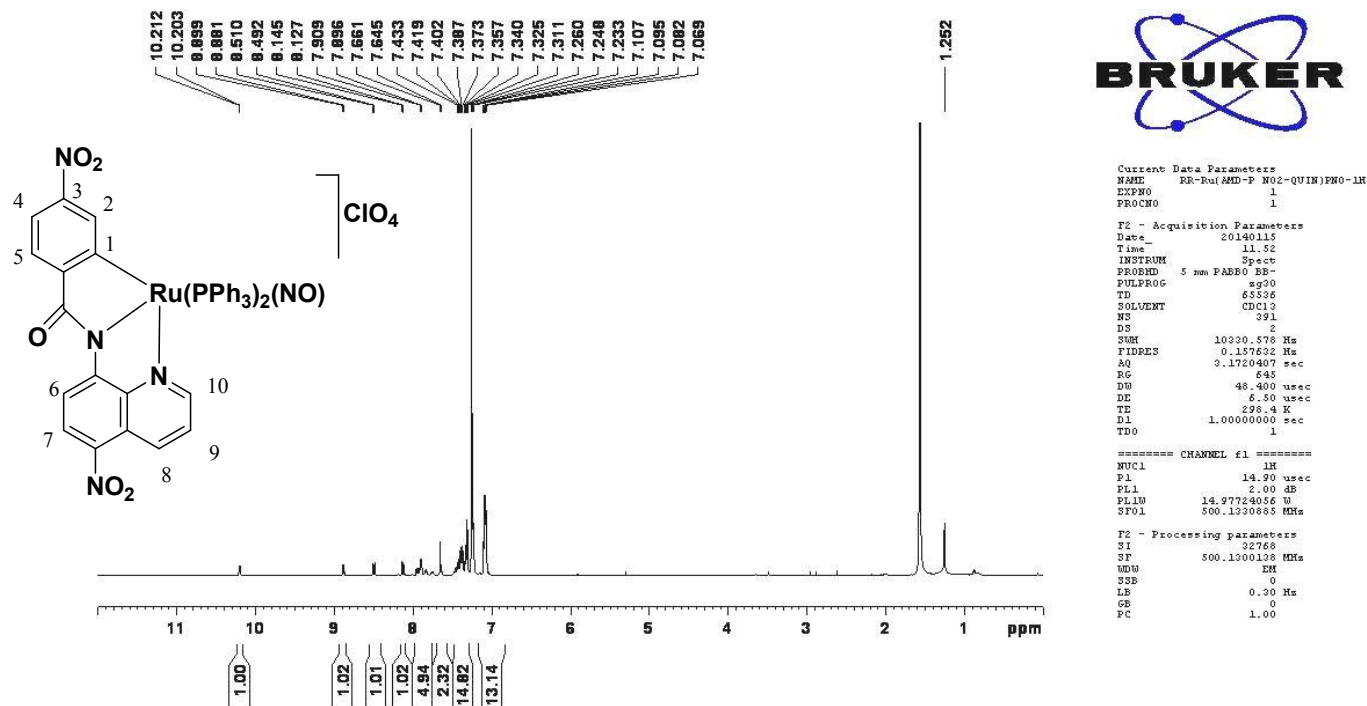

Figure S23.  $^1\text{H}$  NMR spectrum of complex **3a** in  $\text{CDCl}_3$  at room temperature.

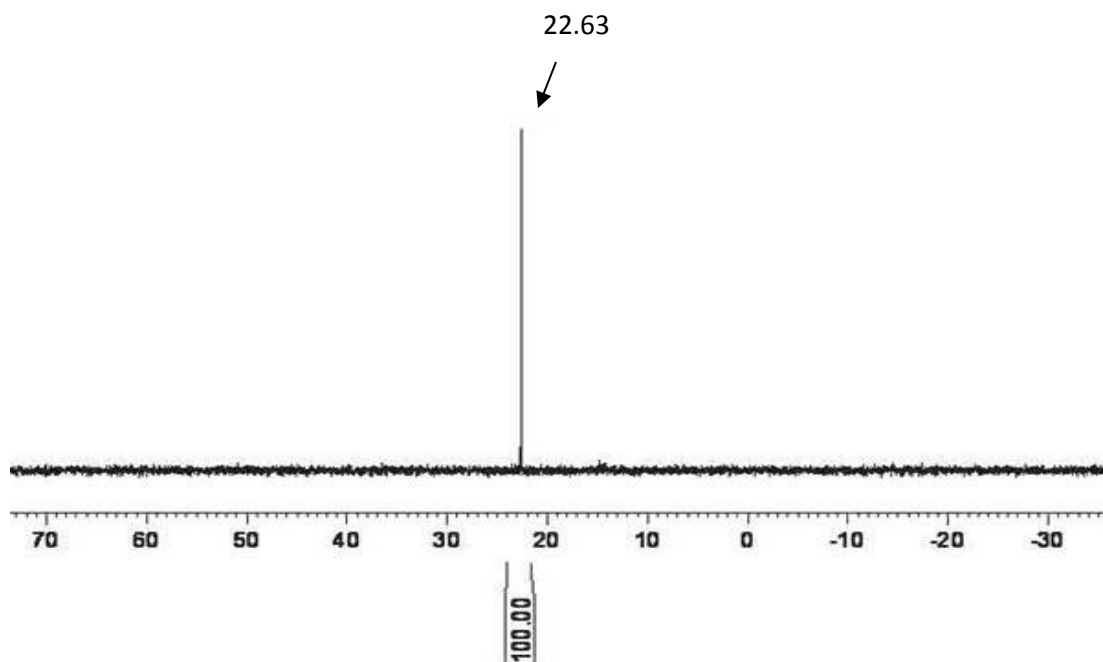

Figure S24.  $^{31}\text{P}$  NMR spectrum of complex **3a** in  $\text{CDCl}_3$  at room temperature.

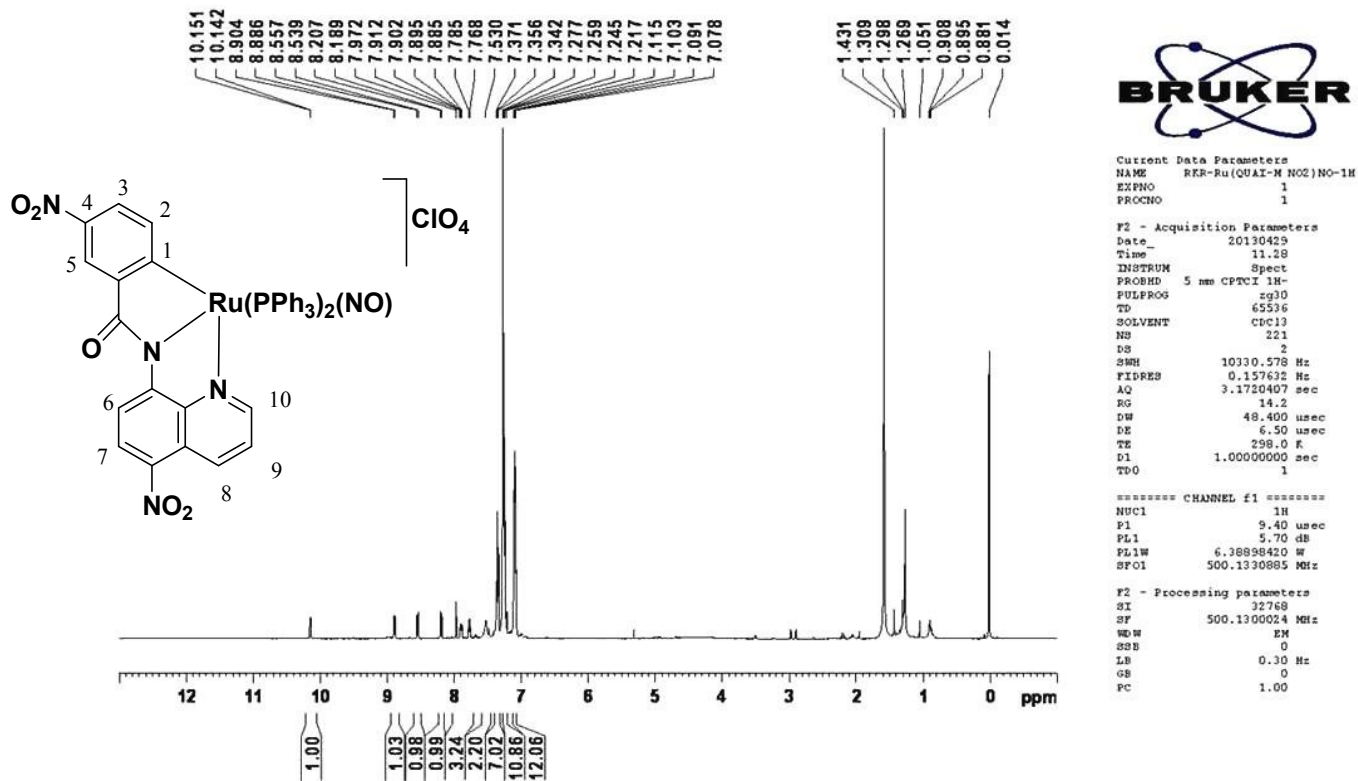

Figure S25.  $^1\text{H}$  NMR spectrum of complex **4a** in  $\text{CDCl}_3$  at room temperature.

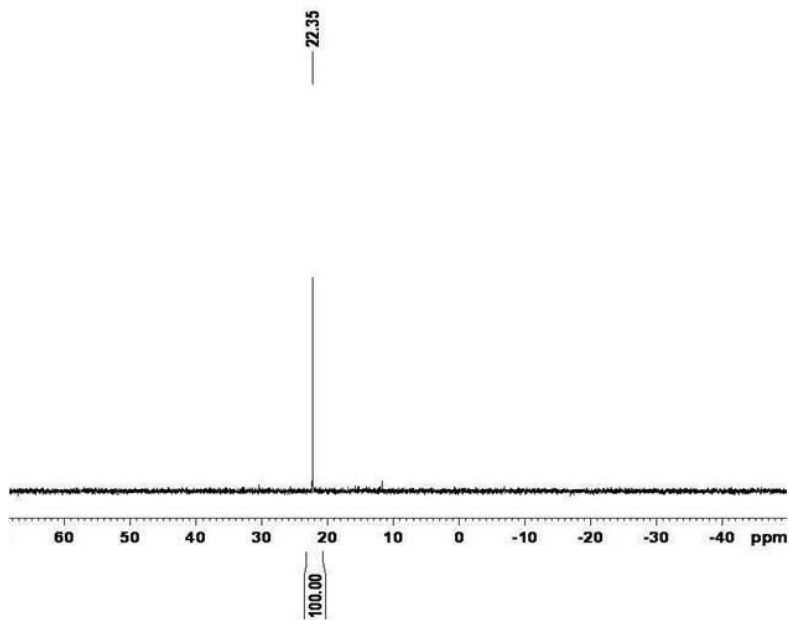

Figure S26.  $^{31}\text{P}$  NMR spectrum of complex **4a** in  $\text{CDCl}_3$  at room temperature.

**Table S3**  $^1\text{H}$  NMR Spectral Data ( $\delta$ , ppm) of nitrosyl complexes **1a**, **2a**, **3a** and **4a**.

| Comp.     | 10-H  | 5-H  | 8-H  | 3-H  | 7-H  | Other protons                                    |
|-----------|-------|------|------|------|------|--------------------------------------------------|
| <b>1a</b> | 9.42  | 9.09 | 8.20 | –    | –    | 7.71–6.13 (PPh <sub>3</sub> , 30H and ligand-H)  |
| <b>2a</b> | 9.62  | 9.29 | 8.39 | –    | –    | 7.86–6.29 (PPh <sub>3</sub> , 30H and ligand-H)  |
| <b>3a</b> | 10.21 | 8.89 | 8.50 | 8.13 | 7.90 | 7.90 –7.06 (PPh <sub>3</sub> , 30H and ligand-H) |
| <b>4a</b> | 10.15 | 8.89 | 8.54 | 8.19 | 7.45 | 7.97–7.07 (PPh <sub>3</sub> , 30H and ligand-H)  |

**Table S4** Comparison table of nitrosyl complexes **1a**, **2a**, **3a** and **4a** for  $\nu_{\text{NO}}$  and  $^{31}\text{P}$  NMR data and substituents in ligand frame

| Complexes | $\nu_{\text{NO}}(\text{cm}^{-1})$ | $^{31}\text{P}$ (ppm) | Substituents in the ligand frame |
|-----------|-----------------------------------|-----------------------|----------------------------------|
| <b>1a</b> | 1880                              | 29.71                 | -H                               |
| <b>2a</b> | 1870                              | 29.73                 | -Cl                              |
| <b>3a</b> | 1830                              | 22.63                 | -NO <sub>2</sub>                 |
| <b>4a</b> | 1845                              | 22.35                 | -NO <sub>2</sub>                 |

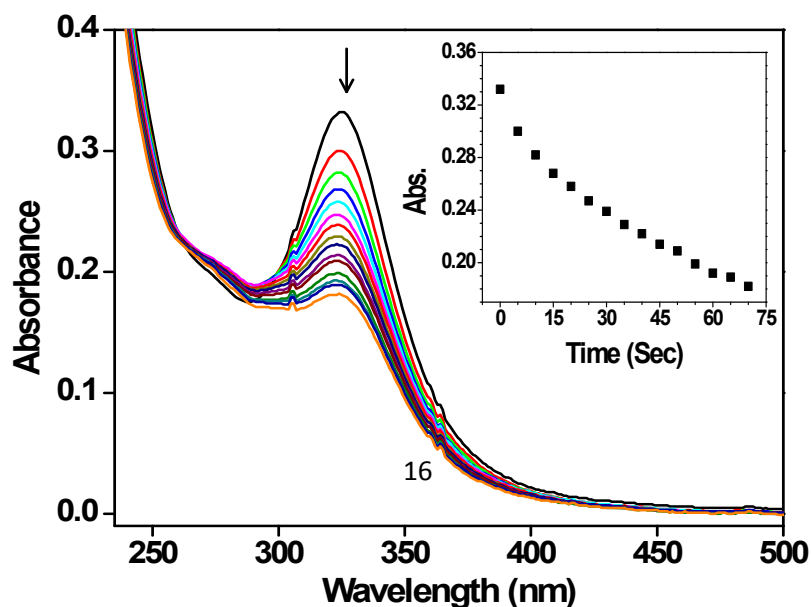



**Figure S27.** Photodissociation of NO from complex **2a** ( $\sim 1.5 \times 10^{-5}$  M) in dichloromethane solutions under illumination with a UV light ( $\lambda_{\text{irr}} = 365$  nm). Repetitive scans were taken in 5 seconds intervals. Inset: Changes in absorbance with time at  $\lambda = 324$  nm at room temperature.

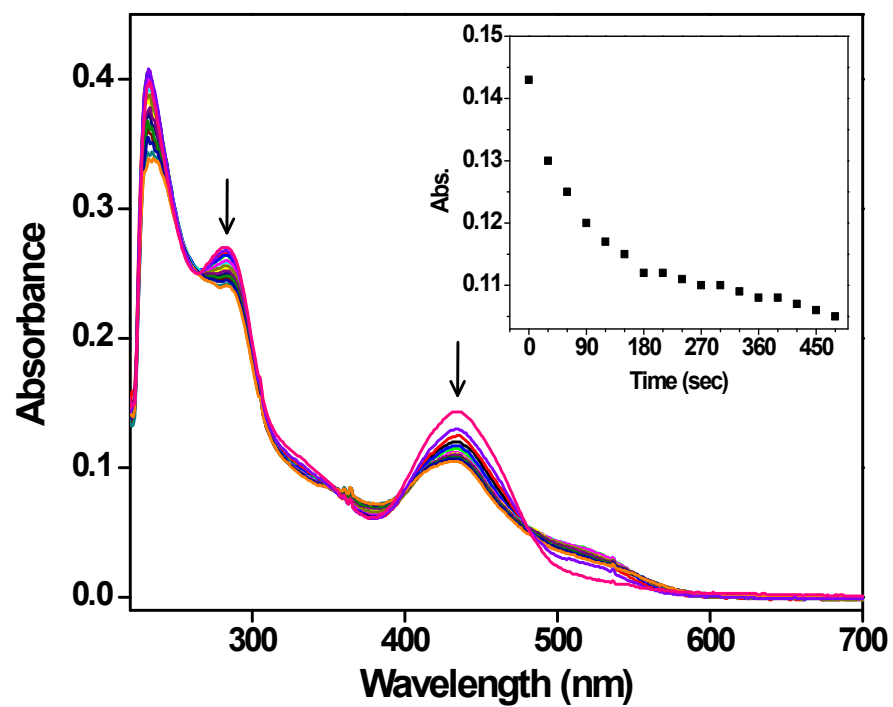

**Figure S28.** Photodissociation of NO from complex **3a** ( $\sim 1.5 \times 10^{-5}$  M) in dichloromethane solutions under illumination with a UV light ( $\lambda_{\text{irr}} = 365$  nm). Repetitive scans were taken in 30 seconds intervals. Inset: Changes in absorbance with time at  $\lambda = 434$  nm at room temperature.

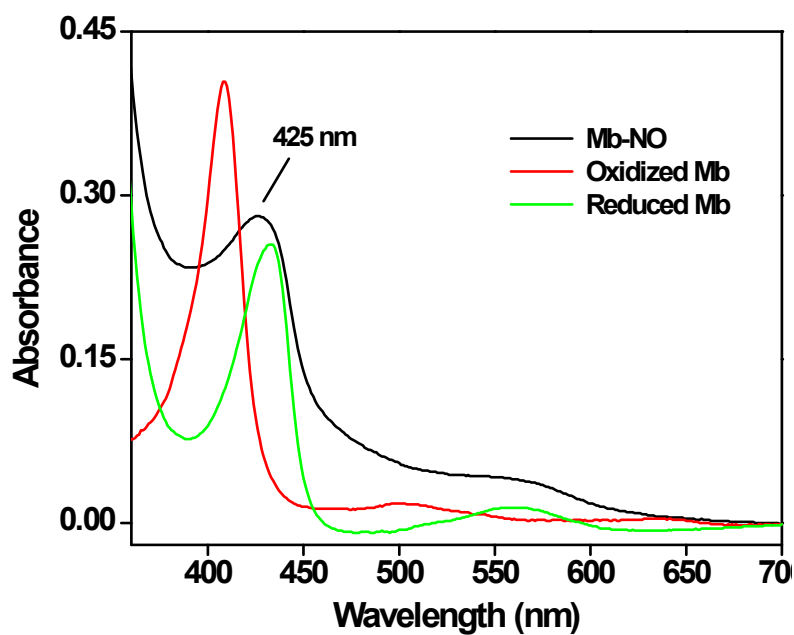

**Figure S29.** Electronic spectra for conversion of reduced Mb to Mb-NO adducts upon reaction with **2a** in buffer solutions (50 mM phosphate buffer, pH 6.8) under exposure of UV light. Red line, oxidized Mb (intense band at  $\sim 409$  nm); blue line, reduced Mb (at  $\sim 433$  nm, with excess of sodium dithionite); Black line, Mb-NO adduct (at  $\sim 425$  nm), obtained by Mb and solution of **2a** ( $\sim 10^{-5}$  M) exposed to UV light ( $\lambda_{\text{irr}} = 365$  nm) for 2-3 minutes at room temperature.

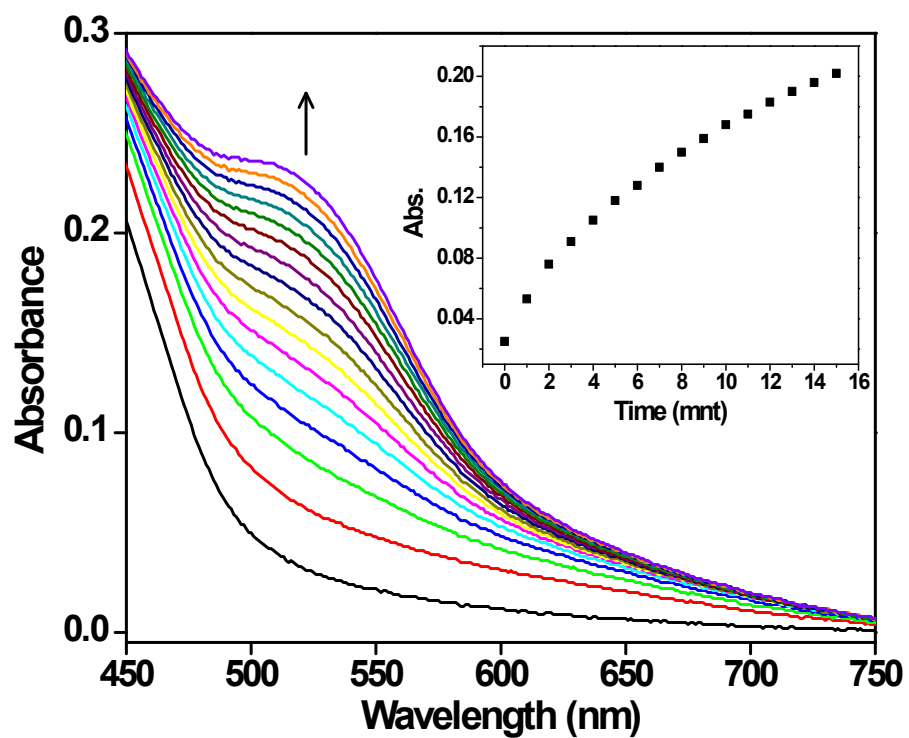

**Figure S30.** Electronic spectra of dye formation when Griess reagent (100  $\mu\text{L}$ ) was treated with complex **2a** (50  $\mu\text{M}$ ) in the presence of UV light ( $\lambda_{\text{irr}} = 365 \text{ nm}$ ). Repetitive scans were taken in 1 minute intervals. Inset: Time dependent changes in absorbance at  $\lambda = 538 \text{ nm}$  at room temperature.

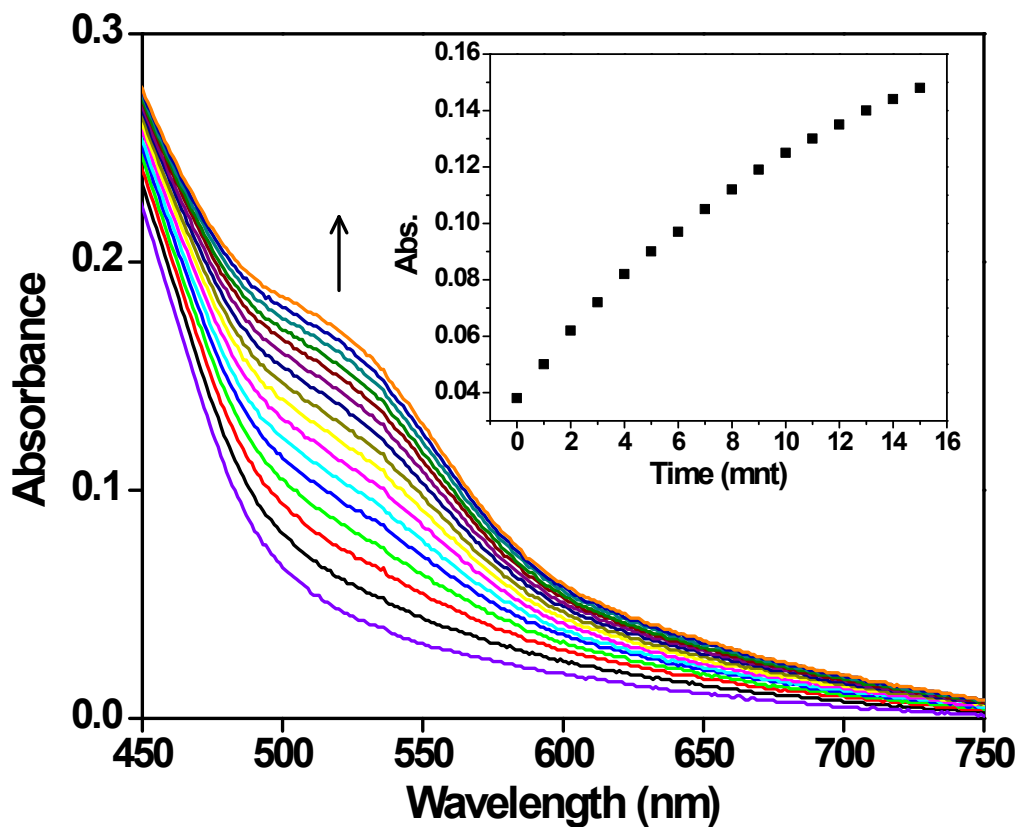

**Figure S31.** Electronic spectra of dye formation when Griess reagent (100  $\mu\text{L}$ ) was treated with complex **2a** (50  $\mu\text{M}$ ) in the presence of visible light (100 Watt tungsten lamp). Repetitive scans were taken in 1 minute intervals. Inset: Time dependent changes in absorbance at  $\lambda = 538$  nm at room temperature.

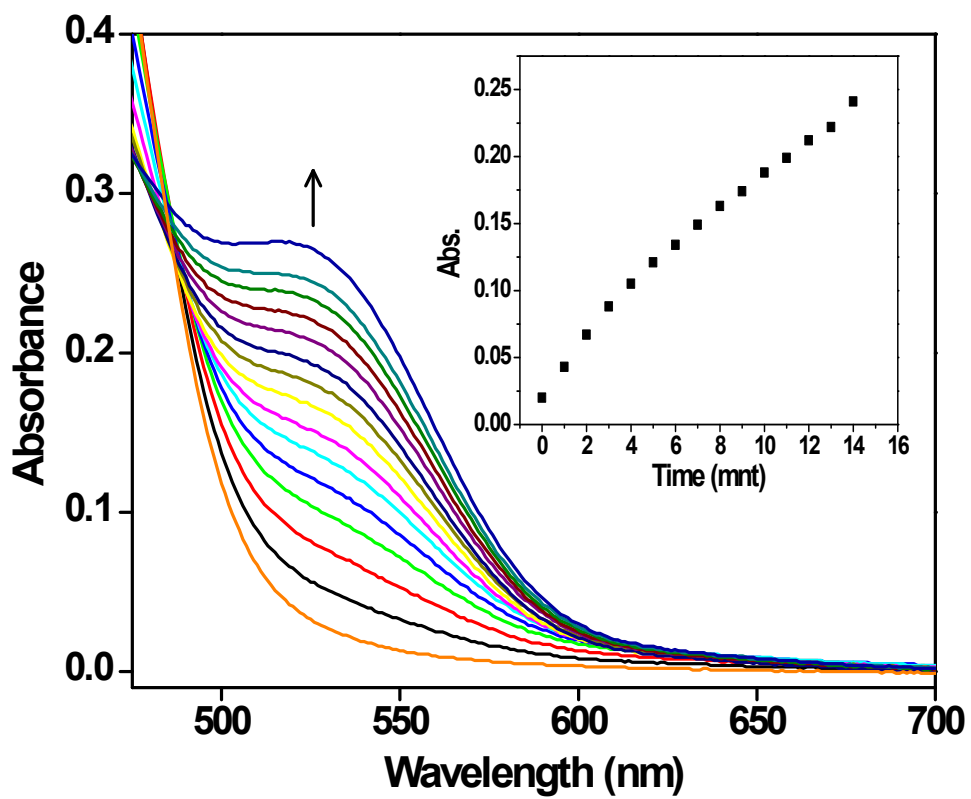

**Figure S32.** Electronic spectra of dye formation when Griess reagent (100  $\mu\text{L}$ ) was treated with complex **4a** (50  $\mu\text{M}$ ) in the presence of visible light (100 Watt tungsten lamp). Repetitive scans were taken in 1 minute intervals. Inset: Time dependent changes in absorbance at  $\lambda = 538$  nm at room temperature.

CIF\_4a

data\_ups1809kgrkr\_11no\_0m

```
_audit_creation_method      SHELXL-97
_chemical_name_systematic
;
?
;
_chemical_name_common       ?
_chemical_melting_point     ?
_chemical_formula_moiety    'C52 H38 N5 O6 P2 Ru, Cl O4, C H2 Cl2'
_chemical_formula_sum
'C53 H40 Cl3 N5 O10 P2 Ru'
_chemical_formula_weight    1176.26
```

```
loop_
  _atom_type_symbol
  _atom_type_description
  _atom_type_scatter_dispersion_real
  _atom_type_scatter_dispersion_imag
  _atom_type_scatter_source
'C' 'C' 0.0033 0.0016
'International Tables Vol C Tables 4.2.6.8 and 6.1.1.4'
'H' 'H' 0.0000 0.0000
'International Tables Vol C Tables 4.2.6.8 and 6.1.1.4'
'N' 'N' 0.0061 0.0033
'International Tables Vol C Tables 4.2.6.8 and 6.1.1.4'
'O' 'O' 0.0106 0.0060
'International Tables Vol C Tables 4.2.6.8 and 6.1.1.4'
'Cl' 'Cl' 0.1484 0.1585
'International Tables Vol C Tables 4.2.6.8 and 6.1.1.4'
'Ru' 'Ru' -1.2594 0.8363
'International Tables Vol C Tables 4.2.6.8 and 6.1.1.4'
'P' 'P' 0.1023 0.0942
'International Tables Vol C Tables 4.2.6.8 and 6.1.1.4'
```

```
_symmetry_cell_setting      Triclinic
_symmetry_space_group_name_H-M 'P -1'
_symmetry_space_group_name_Hall '-P 1'
```

```
loop_
  _symmetry_equiv_pos_as_xyz
'x, y, z'
'-x, -y, -z'
```

```
_cell_length_a              12.0096(5)
```

```

_cell_length_b          12.6429(5)
_cell_length_c          19.2406(8)
_cell_angle_alpha       81.340(2)
_cell_angle_beta        86.300(2)
_cell_angle_gamma       64.743(2)
_cell_volume            2612.02(19)
_cell_formula_units_Z   2
_cell_measurement_temperature 296(2)
_cell_measurement_reflns_used 111
_cell_measurement_theta_min 1.07
_cell_measurement_theta_max 28.34

_exptl_crystal_description block
_exptl_crystal_colour    red
_exptl_crystal_size_max  0.22
_exptl_crystal_size_mid  0.19
_exptl_crystal_size_min  0.17
_exptl_crystal_density_meas  ?
_exptl_crystal_density_diffn 1.496
_exptl_crystal_density_method 'not measured'
_exptl_crystal_F_000      1196
_exptl_absorpt_coefficient_mu 0.578
_exptl_absorpt_correction_type multi-scan
_exptl_absorpt_correction_T_min 0.881
_exptl_absorpt_correction_T_max 0.906
_exptl_absorpt_process_details '(SADABS; Bruker, 2000)'

_exptl_special_details
;
?
;

_diffn_ambient_temperature 296(2)
_diffn_radiation_wavelength 0.71073
_diffn_radiation_type      MoK\alpha
_diffn_radiation_source    'fine-focus sealed tube'
_diffn_radiation_monochromator graphite
_diffn_measurement_device_type 'CCD area detector'
_diffn_measurement_method  'phi omega scans'
_diffn_detector_area_resol_mean ?
_diffn_standards_number    ?
_diffn_standards_interval_count ?
_diffn_standards_interval_time ?
_diffn_standards_decay_%   ?
_diffn_reflns_number       86016
_diffn_reflns_av_R_equivalents 0.0258

```



```

_diffrn_reflms_av_sigmal/netf  0.0183
_diffrn_reflms_limit_h_min    -11
_diffrn_reflms_limit_h_max    16
_diffrn_reflms_limit_k_min    -16
_diffrn_reflms_limit_k_max    16
_diffrn_reflms_limit_l_min    -25
_diffrn_reflms_limit_l_max    25
_diffrn_reflms_theta_min      1.07
_diffrn_reflms_theta_max      28.34
_reflms_number_total          13031
_reflms_number_gt             11073
_reflms_threshold_expression   >2sigma(I)

_computing_data_collection     'Bruker Kappa Apex'
_computing_cell_refinement     'Bruker Kappa Apex'
_computing_data_reduction      'Bruker SAINT'
_computing_structure_solution  'SHELXL-97 (Sheldrick, 1997)'
_computing_structure_refinement 'SHELXL-97 (Sheldrick, 1997)'
_computing_molecular_graphics  'Bruker SHELXTL'
_computing_publication_material 'Bruker SHELXTL'

```

```
_refine_special_details
```

```
;
```

Refinement of  $F^2$  against ALL reflections. The weighted R-factor  $wR$  and goodness of fit  $S$  are based on  $F^2$ , conventional R-factors  $R$  are based on  $F$ , with  $F$  set to zero for negative  $F^2$ . The threshold expression of  $F^2 > 2\sigma(F^2)$  is used only for calculating R-factors(gt) etc. and is not relevant to the choice of reflections for refinement. R-factors based on  $F^2$  are statistically about twice as large as those based on  $F$ , and R-factors based on ALL data will be even larger.

```
;
```

```

_refine_ls_structure_factor_coef Fsqd
_refine_ls_matrix_type          full
_refine_ls_weighting_scheme     calc
_refine_ls_weighting_details
'calc w=1/[s^2*(Fo^2)+(0.1000P)^2+0.8858P] where P=(Fo^2+2Fc^2)/3'
_atom_sites_solution_primary    direct
_atom_sites_solution_secondary  difmap
_atom_sites_solution_hydrogens  geom
_refine_ls_hydrogen_treatment  mixed
_refine_ls_extinction_method    none
_refine_ls_extinction_coef      ?
_refine_ls_number_reflms        13031
_refine_ls_number_parameters    668
_refine_ls_number_restraints    0

```



C17 C 1.2046(3) 0.6078(3) 0.51242(18) 0.0526(8) Uani 1 1 d . . .  
 H17 H 1.2510 0.5334 0.4993 0.063 Uiso 1 1 calc R . .  
 C8 C 1.1407(4) 0.7752(4) 0.8497(2) 0.0682(11) Uani 1 1 d . . .  
 H8 H 1.1173 0.7963 0.8944 0.082 Uiso 1 1 calc R . .  
 C4 C 0.6556(4) 1.1100(4) 0.6327(3) 0.0790(13) Uani 1 1 d . . .  
 H4 H 0.5881 1.1826 0.6238 0.095 Uiso 1 1 calc R . .  
 C12 C 1.2127(3) 0.7107(4) 0.7171(2) 0.0661(10) Uani 1 1 d . . .  
 H12 H 1.2378 0.6878 0.6729 0.079 Uiso 1 1 calc R . .  
 C5 C 0.6816(4) 1.0275(3) 0.5893(3) 0.0699(11) Uani 1 1 d . . .  
 H5 H 0.6318 1.0433 0.5505 0.084 Uiso 1 1 calc R . .  
 C13 C 1.0651(4) 0.8281(3) 0.5510(2) 0.0764(13) Uani 1 1 d . . .  
 H13 H 1.0174 0.9033 0.5627 0.092 Uiso 1 1 calc R . .  
 C2 C 0.8312(4) 0.9794(3) 0.7042(2) 0.0621(9) Uani 1 1 d . . .  
 H2 H 0.8814 0.9655 0.7425 0.074 Uiso 1 1 calc R . .  
 C10 C 1.2616(5) 0.7426(5) 0.8282(3) 0.0897(16) Uani 1 1 d . . .  
 H10 H 1.3192 0.7424 0.8583 0.108 Uiso 1 1 calc R . .  
 C16 C 1.2070(4) 0.7040(4) 0.4726(2) 0.0732(12) Uani 1 1 d . . .  
 H16 H 1.2555 0.6956 0.4323 0.088 Uiso 1 1 calc R . .  
 C11 C 1.2970(4) 0.7103(5) 0.7622(3) 0.0928(16) Uani 1 1 d . . .  
 H11 H 1.3785 0.6882 0.7480 0.111 Uiso 1 1 calc R . .  
 C3 C 0.7290(5) 1.0863(4) 0.6897(3) 0.0868(15) Uani 1 1 d . . .  
 H3 H 0.7099 1.1432 0.7195 0.104 Uiso 1 1 calc R . .  
 C18 C 1.1387(5) 0.8134(4) 0.4910(3) 0.0945(18) Uani 1 1 d . . .  
 H18 H 1.1411 0.8792 0.4631 0.113 Uiso 1 1 calc R . .  
 C25 C 0.9145(3) 0.3037(2) 0.74997(17) 0.0407(6) Uani 1 1 d . . .  
 C24 C 0.6130(3) 0.3988(3) 0.73181(18) 0.0485(7) Uani 1 1 d . . .  
 H24 H 0.6366 0.3501 0.7746 0.058 Uiso 1 1 calc R . .  
 C36 C 0.6275(3) 0.5346(3) 0.85809(17) 0.0496(7) Uani 1 1 d . . .  
 H36 H 0.5706 0.5624 0.8216 0.060 Uiso 1 1 calc R . .  
 C20 C 0.6374(3) 0.5395(3) 0.64161(16) 0.0435(6) Uani 1 1 d . . .  
 H20 H 0.6781 0.5856 0.6230 0.052 Uiso 1 1 calc R . .  
 C23 C 0.5171(3) 0.4022(4) 0.6942(2) 0.0600(9) Uani 1 1 d . . .  
 H23 H 0.4771 0.3548 0.7116 0.072 Uiso 1 1 calc R . .  
 C32 C 0.8351(3) 0.4326(3) 0.89963(16) 0.0458(7) Uani 1 1 d . . .  
 H32 H 0.9189 0.3919 0.8912 0.055 Uiso 1 1 calc R . .  
 C21 C 0.5404(3) 0.5427(3) 0.60484(19) 0.0565(8) Uani 1 1 d . . .  
 H21 H 0.5158 0.5910 0.5620 0.068 Uiso 1 1 calc R . .  
 C22 C 0.4806(3) 0.4740(4) 0.6319(2) 0.0619(10) Uani 1 1 d . . .  
 H22 H 0.4148 0.4767 0.6076 0.074 Uiso 1 1 calc R . .  
 C33 C 0.7937(4) 0.4539(4) 0.96723(17) 0.0610(9) Uani 1 1 d . . .  
 H33 H 0.8499 0.4268 1.0040 0.073 Uiso 1 1 calc R . .  
 C35 C 0.5875(4) 0.5559(4) 0.9264(2) 0.0648(10) Uani 1 1 d . . .  
 H35 H 0.5042 0.5984 0.9353 0.078 Uiso 1 1 calc R . .  
 C34 C 0.6710(4) 0.5143(4) 0.98048(19) 0.0661(10) Uani 1 1 d . . .  
 H34 H 0.6440 0.5271 1.0262 0.079 Uiso 1 1 calc R . .  
 C28 C 1.0807(4) 0.0751(4) 0.7355(3) 0.0842(15) Uani 1 1 d . . .

H28 H 1.1369 -0.0016 0.7308 0.101 Uiso 1 1 calc R . .  
C30 C 0.9519(4) 0.2163(3) 0.8075(2) 0.0707(11) Uani 1 1 d . . .  
H30 H 0.9209 0.2340 0.8519 0.085 Uiso 1 1 calc R . .  
C26 C 0.9613(4) 0.2734(3) 0.6849(2) 0.0605(9) Uani 1 1 d . . .  
H26 H 0.9366 0.3302 0.6454 0.073 Uiso 1 1 calc R . .  
C27 C 1.0448(4) 0.1591(4) 0.6780(3) 0.0753(12) Uani 1 1 d . . .  
H27 H 1.0765 0.1396 0.6340 0.090 Uiso 1 1 calc R . .  
C29 C 1.0350(5) 0.1033(4) 0.7990(3) 0.0916(16) Uani 1 1 d . . .  
H29 H 1.0599 0.0455 0.8380 0.110 Uiso 1 1 calc R . .  
C43 C 0.5088(3) 0.8854(3) 0.67311(19) 0.0534(8) Uani 1 1 d . . .  
H43 H 0.4554 0.9220 0.6351 0.064 Uiso 1 1 calc R . .  
C38 C 0.7423(3) 0.7576(3) 0.89985(17) 0.0481(7) Uani 1 1 d . . .  
H38 H 0.8022 0.7244 0.9348 0.058 Uiso 1 1 calc R . .  
C44 C 0.6254(3) 0.7955(3) 0.66382(16) 0.0431(6) Uani 1 1 d . . .  
H44 H 0.6469 0.7719 0.6195 0.052 Uiso 1 1 calc R . .  
C39 C 0.6251(3) 0.8410(3) 0.91432(18) 0.0537(8) Uani 1 1 d . . .  
H39 H 0.6078 0.8624 0.9593 0.064 Uiso 1 1 calc R . .  
C40 C 0.5363(3) 0.8914(3) 0.86519(19) 0.0501(7) Uani 1 1 d . . .  
C42 C 0.4739(3) 0.9189(3) 0.7373(2) 0.0542(8) Uani 1 1 d . . .  
H42 H 0.3956 0.9772 0.7439 0.065 Uiso 1 1 calc R . .  
C41 C 0.5563(3) 0.8654(3) 0.79449(17) 0.0424(6) Uani 1 1 d . . .  
N4 N 0.4156(3) 0.9751(3) 0.8866(2) 0.0668(9) Uani 1 1 d . . .  
O2 O 0.4103(3) 1.0220(3) 0.9380(2) 0.0949(11) Uani 1 1 d . . .  
O3 O 0.3251(3) 0.9884(5) 0.8553(2) 0.1232(17) Uani 1 1 d . . .  
C47 C 1.1906(3) 0.4147(3) 0.85188(16) 0.0442(6) Uani 1 1 d . . .  
H47 H 1.2038 0.4223 0.8976 0.053 Uiso 1 1 calc R . .  
C49 C 1.2614(3) 0.3135(3) 0.74951(17) 0.0442(6) Uani 1 1 d . . .  
H49 H 1.3217 0.2533 0.7278 0.053 Uiso 1 1 calc R . .  
C48 C 1.2788(3) 0.3305(3) 0.81663(18) 0.0478(7) Uani 1 1 d . . .  
C50 C 1.1512(2) 0.3887(2) 0.71536(15) 0.0378(5) Uani 1 1 d . . .  
H50 H 1.1382 0.3794 0.6700 0.045 Uiso 1 1 calc R . .  
C51 C 0.9818(2) 0.5790(2) 0.85400(14) 0.0358(5) Uani 1 1 d . . .  
O4 O 0.9901(2) 0.5941(2) 0.91409(11) 0.0488(5) Uani 1 1 d . . .  
O7 O 0.6517(8) 0.6932(8) 0.4211(5) 0.224(4) Uani 1 1 d . . .  
O6 O 0.6663(7) 0.8447(6) 0.3964(4) 0.220(4) Uani 1 1 d . . .  
O8 O 0.7977(8) 0.7163(7) 0.4771(6) 0.271(5) Uani 1 1 d . . .  
O5 O 0.5945(9) 0.8223(11) 0.4989(3) 0.290(6) Uani 1 1 d . . .  
N6 N 1.3983(3) 0.2545(3) 0.85178(19) 0.0671(9) Uani 1 1 d . . .  
O10 O 1.4781(3) 0.1812(3) 0.81900(17) 0.0859(10) Uani 1 1 d . . .  
O9 O 1.4125(3) 0.2685(4) 0.9108(2) 0.1083(14) Uani 1 1 d . . .  
Cl2 Cl 0.7107(3) 0.2102(3) 0.9670(2) 0.1987(13) Uani 1 1 d . . .  
Cl3 Cl 0.8448(6) -0.0081(7) 0.9243(6) 0.563(9) Uani 1 1 d . . .  
C54 C 0.7171(8) 0.0918(8) 0.9379(5) 0.147(3) Uani 1 1 d . . .  
H54A H 0.6738 0.0574 0.9714 0.177 Uiso 1 1 calc R . .  
H54B H 0.6712 0.1176 0.8942 0.177 Uiso 1 1 calc R . .

loop\_

\_atom\_site\_aniso\_label

\_atom\_site\_aniso\_U\_11

\_atom\_site\_aniso\_U\_22

\_atom\_site\_aniso\_U\_33

\_atom\_site\_aniso\_U\_23

\_atom\_site\_aniso\_U\_13

\_atom\_site\_aniso\_U\_12

Ru1 0.02840(12) 0.02992(12) 0.02665(12) -0.00523(8) -0.00144(8) -0.01240(9)

P2 0.0312(3) 0.0325(3) 0.0315(3) -0.0030(2) -0.0023(2) -0.0154(3)

P1 0.0314(3) 0.0305(3) 0.0355(3) -0.0069(2) 0.0011(3) -0.0145(3)

N2 0.0332(10) 0.0352(11) 0.0289(10) -0.0079(8) -0.0002(8) -0.0145(9)

N3 0.0352(11) 0.0355(11) 0.0340(11) -0.0048(9) -0.0028(9) -0.0162(9)

N1 0.0319(10) 0.0346(11) 0.0335(10) -0.0036(8) -0.0021(8) -0.0132(9)

C53 0.0313(11) 0.0332(12) 0.0347(12) -0.0027(10) -0.0034(10) -0.0148(10)

C1 0.0366(13) 0.0317(13) 0.0503(16) -0.0024(11) 0.0021(12) -0.0150(11)

C45 0.0350(12) 0.0327(12) 0.0378(13) -0.0067(10) 0.0024(10) -0.0157(10)

C19 0.0319(12) 0.0379(13) 0.0427(14) -0.0114(11) -0.0018(10) -0.0164(10)

O1 0.0728(16) 0.0710(16) 0.0347(11) -0.0233(10) 0.0057(10) -0.0348(13)

C46 0.0360(13) 0.0378(13) 0.0366(13) -0.0042(10) -0.0036(10) -0.0159(11)

C37 0.0358(12) 0.0348(13) 0.0352(12) -0.0089(10) 0.0030(10) -0.0162(10)

C7 0.0416(14) 0.0362(14) 0.0549(17) -0.0060(12) -0.0107(13) -0.0185(11)

C31 0.0474(15) 0.0442(15) 0.0325(13) -0.0035(11) 0.0019(11) -0.0255(12)

C11 0.0856(7) 0.0601(5) 0.0513(5) -0.0034(4) -0.0197(5) -0.0168(5)

C14 0.0428(14) 0.0421(15) 0.0412(14) -0.0055(11) 0.0092(12) -0.0210(12)

C15 0.0425(14) 0.0454(15) 0.0411(14) -0.0084(12) 0.0049(12) -0.0205(12)

C9 0.0606(19) 0.0466(17) 0.0537(18) -0.0085(14) -0.0068(15) -0.0295(15)

C6 0.0524(18) 0.0434(17) 0.069(2) 0.0021(15) -0.0132(16) -0.0203(14)

C17 0.0495(17) 0.062(2) 0.0482(17) -0.0163(15) 0.0106(14) -0.0234(15)

C8 0.090(3) 0.062(2) 0.060(2) -0.0069(18) -0.026(2) -0.036(2)

C4 0.052(2) 0.044(2) 0.122(4) 0.008(2) -0.004(2) -0.0074(16)

C12 0.0412(17) 0.071(2) 0.088(3) -0.030(2) -0.0055(17) -0.0186(16)

C5 0.055(2) 0.052(2) 0.096(3) 0.017(2) -0.022(2) -0.0223(17)

C13 0.085(3) 0.047(2) 0.090(3) -0.0077(19) 0.041(2) -0.0272(19)

C2 0.061(2) 0.0422(17) 0.074(2) -0.0168(16) -0.0005(18) -0.0104(15)

C10 0.074(3) 0.089(3) 0.109(4) -0.017(3) -0.046(3) -0.030(2)

C16 0.074(3) 0.074(3) 0.059(2) -0.0017(19) 0.026(2) -0.027(2)

C11 0.047(2) 0.101(4) 0.131(5) -0.028(3) -0.024(3) -0.024(2)

C3 0.076(3) 0.047(2) 0.117(4) -0.025(2) 0.005(3) -0.003(2)

C18 0.108(4) 0.064(3) 0.093(3) 0.009(2) 0.052(3) -0.033(3)

C25 0.0353(13) 0.0340(13) 0.0547(17) -0.0065(12) -0.0016(12) -0.0161(11)

C24 0.0441(15) 0.0525(17) 0.0571(18) -0.0069(14) -0.0024(14) -0.0279(14)

C36 0.0484(16) 0.0584(19) 0.0426(16) -0.0104(14) 0.0037(13) -0.0224(15)

C20 0.0407(14) 0.0469(16) 0.0437(15) -0.0069(12) -0.0060(12) -0.0182(12)

C23 0.0438(17) 0.068(2) 0.082(3) -0.0183(19) -0.0001(17) -0.0348(16)

C32 0.0496(16) 0.0552(18) 0.0392(14) 0.0009(13) -0.0065(12) -0.0301(14)

C21 0.0474(17) 0.066(2) 0.0519(18) -0.0123(16) -0.0147(15) -0.0166(16)  
 C22 0.0363(15) 0.079(3) 0.078(3) -0.031(2) -0.0094(16) -0.0240(16)  
 C33 0.081(3) 0.083(3) 0.0349(15) -0.0010(16) -0.0081(16) -0.050(2)  
 C35 0.061(2) 0.083(3) 0.058(2) -0.027(2) 0.0214(18) -0.035(2)  
 C34 0.087(3) 0.091(3) 0.0404(17) -0.0197(18) 0.0115(18) -0.054(2)  
 C28 0.059(2) 0.042(2) 0.139(5) -0.017(3) -0.009(3) -0.0067(17)  
 C30 0.085(3) 0.0445(19) 0.065(2) 0.0009(17) -0.010(2) -0.0116(18)  
 C26 0.072(2) 0.0433(17) 0.066(2) -0.0140(16) 0.0155(18) -0.0240(16)  
 C27 0.074(3) 0.058(2) 0.099(3) -0.036(2) 0.027(2) -0.029(2)  
 C29 0.110(4) 0.044(2) 0.088(3) -0.002(2) -0.028(3) -0.001(2)  
 C43 0.0393(15) 0.0526(18) 0.0562(19) -0.0010(15) -0.0113(14) -0.0084(13)  
 C38 0.0498(17) 0.0523(17) 0.0425(15) -0.0162(13) 0.0018(13) -0.0190(14)  
 C44 0.0418(14) 0.0458(16) 0.0382(14) -0.0041(12) -0.0053(12) -0.0150(12)  
 C39 0.0590(19) 0.0577(19) 0.0457(16) -0.0250(15) 0.0145(15) -0.0221(16)  
 C40 0.0422(15) 0.0479(17) 0.0594(19) -0.0236(15) 0.0158(14) -0.0151(13)  
 C42 0.0375(15) 0.0448(17) 0.068(2) -0.0094(15) 0.0007(14) -0.0056(12)  
 C41 0.0383(14) 0.0367(14) 0.0518(16) -0.0109(12) 0.0072(12) -0.0148(11)  
 N4 0.0512(17) 0.067(2) 0.072(2) -0.0256(17) 0.0179(16) -0.0122(15)  
 O2 0.080(2) 0.093(2) 0.095(2) -0.056(2) 0.0230(18) -0.0085(17)  
 O3 0.0475(17) 0.182(4) 0.119(3) -0.080(3) 0.0149(19) -0.011(2)  
 C47 0.0403(14) 0.0477(16) 0.0403(14) -0.0021(12) -0.0113(12) -0.0140(12)  
 C49 0.0376(14) 0.0391(15) 0.0498(16) -0.0055(12) 0.0008(12) -0.0107(11)  
 C48 0.0380(14) 0.0437(16) 0.0535(17) 0.0005(13) -0.0108(13) -0.0103(12)  
 C50 0.0343(12) 0.0392(14) 0.0389(13) -0.0074(11) 0.0016(11) -0.0144(11)  
 C51 0.0373(13) 0.0404(14) 0.0311(12) -0.0050(10) -0.0026(10) -0.0172(11)  
 O4 0.0484(12) 0.0600(13) 0.0357(10) -0.0132(9) -0.0091(9) -0.0175(10)  
 O7 0.215(8) 0.230(8) 0.275(9) -0.149(8) -0.016(7) -0.101(7)  
 O6 0.154(6) 0.166(6) 0.240(8) 0.107(6) 0.015(5) -0.018(4)  
 O8 0.214(8) 0.173(6) 0.376(12) 0.039(7) -0.222(9) -0.028(5)  
 O5 0.223(8) 0.488(16) 0.095(4) -0.135(7) 0.016(5) -0.060(10)  
 N6 0.0479(16) 0.065(2) 0.069(2) -0.0026(16) -0.0174(15) -0.0044(14)  
 O10 0.0471(14) 0.090(2) 0.079(2) -0.0075(17) -0.0071(14) 0.0103(14)  
 O9 0.076(2) 0.109(3) 0.098(3) -0.029(2) -0.050(2) 0.0134(19)  
 Cl2 0.212(3) 0.176(2) 0.259(3) -0.102(2) 0.050(3) -0.114(2)  
 Cl3 0.358(8) 0.560(12) 1.03(2) -0.627(14) 0.454(11) -0.336(9)  
 C54 0.112(6) 0.157(7) 0.171(8) -0.056(6) -0.018(5) -0.042(5)

\_geom\_special\_details

;

All esds (except the esd in the dihedral angle between two l.s. planes) are estimated using the full covariance matrix. The cell esds are taken into account individually in the estimation of esds in distances, angles and torsion angles; correlations between esds in cell parameters are only used when they are defined by crystal symmetry. An approximate (isotropic) treatment of cell esds is used for estimating esds involving l.s. planes.

;

loop\_  
\_geom\_bond\_atom\_site\_label\_1  
\_geom\_bond\_atom\_site\_label\_2  
\_geom\_bond\_distance  
\_geom\_bond\_site\_symmetry\_2  
\_geom\_bond\_publ\_flag  
Ru1 N3 1.759(2) . ?  
Ru1 N2 2.040(2) . ?  
Ru1 C53 2.068(3) . ?  
Ru1 N1 2.176(2) . ?  
Ru1 P2 2.4647(7) . ?  
Ru1 P1 2.4710(7) . ?  
P2 C19 1.818(3) . ?  
P2 C31 1.821(3) . ?  
P2 C25 1.827(3) . ?  
P1 C1 1.809(3) . ?  
P1 C7 1.822(3) . ?  
P1 C14 1.825(3) . ?  
N2 C51 1.390(3) . ?  
N2 C37 1.398(3) . ?  
N3 O1 1.139(3) . ?  
N1 C44 1.319(4) . ?  
N1 C45 1.368(3) . ?  
C53 C46 1.400(4) . ?  
C53 C50 1.397(4) . ?  
C1 C2 1.388(5) . ?  
C1 C6 1.392(5) . ?  
C45 C41 1.422(4) . ?  
C45 C37 1.434(4) . ?  
C19 C20 1.384(4) . ?  
C19 C24 1.402(4) . ?  
C46 C47 1.382(4) . ?  
C46 C51 1.488(4) . ?  
C37 C38 1.384(4) . ?  
C7 C9 1.398(5) . ?  
C7 C12 1.409(5) . ?  
C31 C36 1.388(4) . ?  
C31 C32 1.393(4) . ?  
Cl1 O6 1.313(6) . ?  
Cl1 O8 1.337(6) . ?  
Cl1 O5 1.343(7) . ?  
Cl1 O7 1.375(6) . ?  
C14 C15 1.384(4) . ?  
C14 C13 1.389(5) . ?  
C15 C17 1.390(4) . ?

C15 H15 0.9300 . ?  
C9 C8 1.391(5) . ?  
C9 H9 0.9300 . ?  
C6 C5 1.383(5) . ?  
C6 H6 0.9300 . ?  
C17 C16 1.347(5) . ?  
C17 H17 0.9300 . ?  
C8 C10 1.383(7) . ?  
C8 H8 0.9300 . ?  
C4 C5 1.355(7) . ?  
C4 C3 1.367(8) . ?  
C4 H4 0.9300 . ?  
C12 C11 1.373(6) . ?  
C12 H12 0.9300 . ?  
C5 H5 0.9300 . ?  
C13 C18 1.393(6) . ?  
C13 H13 0.9300 . ?  
C2 C3 1.389(6) . ?  
C2 H2 0.9300 . ?  
C10 C11 1.378(8) . ?  
C10 H10 0.9300 . ?  
C16 C18 1.361(7) . ?  
C16 H16 0.9300 . ?  
C11 H11 0.9300 . ?  
C3 H3 0.9300 . ?  
C18 H18 0.9300 . ?  
C25 C26 1.378(5) . ?  
C25 C30 1.385(5) . ?  
C24 C23 1.382(5) . ?  
C24 H24 0.9300 . ?  
C36 C35 1.395(5) . ?  
C36 H36 0.9300 . ?  
C20 C21 1.385(4) . ?  
C20 H20 0.9300 . ?  
C23 C22 1.362(6) . ?  
C23 H23 0.9300 . ?  
C32 C33 1.385(5) . ?  
C32 H32 0.9300 . ?  
C21 C22 1.373(6) . ?  
C21 H21 0.9300 . ?  
C22 H22 0.9300 . ?  
C33 C34 1.367(6) . ?  
C33 H33 0.9300 . ?  
C35 C34 1.372(6) . ?  
C35 H35 0.9300 . ?  
C34 H34 0.9300 . ?



C28 C29 1.340(8) . ?  
C28 C27 1.362(7) . ?  
C28 H28 0.9300 . ?  
C30 C29 1.377(6) . ?  
C30 H30 0.9300 . ?  
C26 C27 1.384(5) . ?  
C26 H26 0.9300 . ?  
C27 H27 0.9300 . ?  
C29 H29 0.9300 . ?  
C43 C42 1.349(5) . ?  
C43 C44 1.398(4) . ?  
C43 H43 0.9300 . ?  
C38 C39 1.394(5) . ?  
C38 H38 0.9300 . ?  
C44 H44 0.9300 . ?  
C39 C40 1.344(5) . ?  
C39 H39 0.9300 . ?  
C40 C41 1.429(4) . ?  
C40 N4 1.461(4) . ?  
C42 C41 1.412(5) . ?  
C42 H42 0.9300 . ?  
N4 O2 1.212(5) . ?  
N4 O3 1.212(5) . ?  
C47 C48 1.370(5) . ?  
C47 H47 0.9300 . ?  
C49 C48 1.384(5) . ?  
C49 C50 1.391(4) . ?  
C49 H49 0.9300 . ?  
C48 N6 1.482(4) . ?  
C50 H50 0.9300 . ?  
C51 O4 1.217(3) . ?  
N6 O9 1.210(5) . ?  
N6 O10 1.230(4) . ?  
Cl2 C54 1.646(8) . ?  
Cl3 C54 1.552(10) . ?  
C54 H54A 0.9700 . ?  
C54 H54B 0.9700 . ?

loop\_

\_geom\_angle\_atom\_site\_label\_1  
\_geom\_angle\_atom\_site\_label\_2  
\_geom\_angle\_atom\_site\_label\_3  
\_geom\_angle  
\_geom\_angle\_site\_symmetry\_1  
\_geom\_angle\_site\_symmetry\_3  
\_geom\_angle\_publ\_flag

N3 Ru1 N2 174.69(9) .. ?  
N3 Ru1 C53 95.06(10) .. ?  
N2 Ru1 C53 79.63(10) .. ?  
N3 Ru1 N1 108.65(9) .. ?  
N2 Ru1 N1 76.66(8) .. ?  
C53 Ru1 N1 156.22(10) .. ?  
N3 Ru1 P2 91.53(7) .. ?  
N2 Ru1 P2 88.69(6) .. ?  
C53 Ru1 P2 88.35(7) .. ?  
N1 Ru1 P2 89.27(6) .. ?  
N3 Ru1 P1 92.51(7) .. ?  
N2 Ru1 P1 87.11(6) .. ?  
C53 Ru1 P1 89.36(7) .. ?  
N1 Ru1 P1 91.28(6) .. ?  
P2 Ru1 P1 175.52(2) .. ?  
C19 P2 C31 105.13(13) .. ?  
C19 P2 C25 102.00(13) .. ?  
C31 P2 C25 108.82(14) .. ?  
C19 P2 Ru1 115.64(9) .. ?  
C31 P2 Ru1 110.69(9) .. ?  
C25 P2 Ru1 113.84(9) .. ?  
C1 P1 C7 108.02(14) .. ?  
C1 P1 C14 103.48(14) .. ?  
C7 P1 C14 102.93(15) .. ?  
C1 P1 Ru1 110.12(9) .. ?  
C7 P1 Ru1 116.34(10) .. ?  
C14 P1 Ru1 114.92(10) .. ?  
C51 N2 C37 122.3(2) .. ?  
C51 N2 Ru1 118.92(17) .. ?  
C37 N2 Ru1 118.70(17) .. ?  
O1 N3 Ru1 175.3(2) .. ?  
C44 N1 C45 118.8(2) .. ?  
C44 N1 Ru1 127.4(2) .. ?  
C45 N1 Ru1 113.74(17) .. ?  
C46 C53 C50 118.1(2) .. ?  
C46 C53 Ru1 112.95(19) .. ?  
C50 C53 Ru1 128.9(2) .. ?  
C2 C1 C6 118.3(3) .. ?  
C2 C1 P1 124.9(3) .. ?  
C6 C1 P1 116.8(2) .. ?  
N1 C45 C41 121.6(3) .. ?  
N1 C45 C37 116.7(2) .. ?  
C41 C45 C37 121.8(3) .. ?  
C20 C19 C24 118.1(3) .. ?  
C20 C19 P2 122.7(2) .. ?  
C24 C19 P2 119.1(2) .. ?

C47 C46 C53 121.9(3) .. ?  
C47 C46 C51 119.8(3) .. ?  
C53 C46 C51 118.3(2) .. ?  
C38 C37 N2 127.3(3) .. ?  
C38 C37 C45 118.7(3) .. ?  
N2 C37 C45 114.0(2) .. ?  
C9 C7 C12 118.5(3) .. ?  
C9 C7 P1 122.0(2) .. ?  
C12 C7 P1 119.5(3) .. ?  
C36 C31 C32 118.7(3) .. ?  
C36 C31 P2 120.4(2) .. ?  
C32 C31 P2 120.6(2) .. ?  
O6 C11 O8 113.4(6) .. ?  
O6 C11 O5 106.5(6) .. ?  
O8 C11 O5 116.1(6) .. ?  
O6 C11 O7 94.9(6) .. ?  
O8 C11 O7 112.7(5) .. ?  
O5 C11 O7 111.1(7) .. ?  
C15 C14 C13 118.8(3) .. ?  
C15 C14 P1 121.2(2) .. ?  
C13 C14 P1 119.9(3) .. ?  
C14 C15 C17 120.4(3) .. ?  
C14 C15 H15 119.8 .. ?  
C17 C15 H15 119.8 .. ?  
C8 C9 C7 120.0(4) .. ?  
C8 C9 H9 120.0 .. ?  
C7 C9 H9 120.0 .. ?  
C5 C6 C1 121.3(4) .. ?  
C5 C6 H6 119.4 .. ?  
C1 C6 H6 119.4 .. ?  
C16 C17 C15 120.4(3) .. ?  
C16 C17 H17 119.8 .. ?  
C15 C17 H17 119.8 .. ?  
C10 C8 C9 120.3(4) .. ?  
C10 C8 H8 119.9 .. ?  
C9 C8 H8 119.9 .. ?  
C5 C4 C3 119.8(4) .. ?  
C5 C4 H4 120.1 .. ?  
C3 C4 H4 120.1 .. ?  
C11 C12 C7 120.6(4) .. ?  
C11 C12 H12 119.7 .. ?  
C7 C12 H12 119.7 .. ?  
C4 C5 C6 119.9(4) .. ?  
C4 C5 H5 120.1 .. ?  
C6 C5 H5 120.1 .. ?  
C18 C13 C14 119.2(4) .. ?

C18 C13 H13 120.4 . . ?  
C14 C13 H13 120.4 . . ?  
C1 C2 C3 119.1(4) . . ?  
C1 C2 H2 120.5 . . ?  
C3 C2 H2 120.5 . . ?  
C11 C10 C8 120.1(4) . . ?  
C11 C10 H10 119.9 . . ?  
C8 C10 H10 119.9 . . ?  
C17 C16 C18 120.3(4) . . ?  
C17 C16 H16 119.9 . . ?  
C18 C16 H16 119.9 . . ?  
C12 C11 C10 120.5(5) . . ?  
C12 C11 H11 119.8 . . ?  
C10 C11 H11 119.8 . . ?  
C4 C3 C2 121.6(5) . . ?  
C4 C3 H3 119.2 . . ?  
C2 C3 H3 119.2 . . ?  
C16 C18 C13 120.9(4) . . ?  
C16 C18 H18 119.5 . . ?  
C13 C18 H18 119.5 . . ?  
C26 C25 C30 118.1(3) . . ?  
C26 C25 P2 117.4(2) . . ?  
C30 C25 P2 124.5(3) . . ?  
C23 C24 C19 120.1(3) . . ?  
C23 C24 H24 119.9 . . ?  
C19 C24 H24 119.9 . . ?  
C35 C36 C31 120.4(3) . . ?  
C35 C36 H36 119.8 . . ?  
C31 C36 H36 119.8 . . ?  
C19 C20 C21 121.1(3) . . ?  
C19 C20 H20 119.5 . . ?  
C21 C20 H20 119.5 . . ?  
C22 C23 C24 120.6(3) . . ?  
C22 C23 H23 119.7 . . ?  
C24 C23 H23 119.7 . . ?  
C33 C32 C31 120.1(3) . . ?  
C33 C32 H32 119.9 . . ?  
C31 C32 H32 119.9 . . ?  
C22 C21 C20 119.7(3) . . ?  
C22 C21 H21 120.2 . . ?  
C20 C21 H21 120.2 . . ?  
C23 C22 C21 120.4(3) . . ?  
C23 C22 H22 119.8 . . ?  
C21 C22 H22 119.8 . . ?  
C34 C33 C32 120.7(3) . . ?  
C34 C33 H33 119.6 . . ?

C32 C33 H33 119.6 .. ?  
C34 C35 C36 120.0(4) .. ?  
C34 C35 H35 120.0 .. ?  
C36 C35 H35 120.0 .. ?  
C33 C34 C35 120.1(3) .. ?  
C33 C34 H34 120.0 .. ?  
C35 C34 H34 120.0 .. ?  
C29 C28 C27 119.9(4) .. ?  
C29 C28 H28 120.1 .. ?  
C27 C28 H28 120.1 .. ?  
C25 C30 C29 120.1(4) .. ?  
C25 C30 H30 120.0 .. ?  
C29 C30 H30 120.0 .. ?  
C27 C26 C25 120.4(4) .. ?  
C27 C26 H26 119.8 .. ?  
C25 C26 H26 119.8 .. ?  
C28 C27 C26 120.2(4) .. ?  
C28 C27 H27 119.9 .. ?  
C26 C27 H27 119.9 .. ?  
C28 C29 C30 121.3(5) .. ?  
C28 C29 H29 119.4 .. ?  
C30 C29 H29 119.4 .. ?  
C42 C43 C44 119.9(3) .. ?  
C42 C43 H43 120.1 .. ?  
C44 C43 H43 120.1 .. ?  
C37 C38 C39 119.7(3) .. ?  
C37 C38 H38 120.2 .. ?  
C39 C38 H38 120.2 .. ?  
N1 C44 C43 122.6(3) .. ?  
N1 C44 H44 118.7 .. ?  
C43 C44 H44 118.7 .. ?  
C40 C39 C38 122.0(3) .. ?  
C40 C39 H39 119.0 .. ?  
C38 C39 H39 119.0 .. ?  
C39 C40 C41 122.4(3) .. ?  
C39 C40 N4 117.4(3) .. ?  
C41 C40 N4 120.1(3) .. ?  
C43 C42 C41 119.9(3) .. ?  
C43 C42 H42 120.0 .. ?  
C41 C42 H42 120.0 .. ?  
C42 C41 C45 117.0(3) .. ?  
C42 C41 C40 127.6(3) .. ?  
C45 C41 C40 115.4(3) .. ?  
O2 N4 O3 123.1(3) .. ?  
O2 N4 C40 118.0(4) .. ?  
O3 N4 C40 118.8(3) .. ?

C48 C47 C46 117.9(3) . . ?  
C48 C47 H47 121.1 . . ?  
C46 C47 H47 121.1 . . ?  
C48 C49 C50 118.3(3) . . ?  
C48 C49 H49 120.9 . . ?  
C50 C49 H49 120.9 . . ?  
C47 C48 C49 123.0(3) . . ?  
C47 C48 N6 118.6(3) . . ?  
C49 C48 N6 118.4(3) . . ?  
C49 C50 C53 120.8(3) . . ?  
C49 C50 H50 119.6 . . ?  
C53 C50 H50 119.6 . . ?  
O4 C51 N2 126.2(3) . . ?  
O4 C51 C46 123.7(3) . . ?  
N2 C51 C46 110.1(2) . . ?  
O9 N6 O10 123.6(3) . . ?  
O9 N6 C48 118.2(3) . . ?  
O10 N6 C48 118.1(3) . . ?  
Cl3 C54 Cl2 119.2(6) . . ?  
Cl3 C54 H54A 107.5 . . ?  
Cl2 C54 H54A 107.5 . . ?  
Cl3 C54 H54B 107.5 . . ?  
Cl2 C54 H54B 107.5 . . ?  
H54A C54 H54B 107.0 . . ?

loop\_

\_geom\_torsion\_atom\_site\_label\_1  
\_geom\_torsion\_atom\_site\_label\_2  
\_geom\_torsion\_atom\_site\_label\_3  
\_geom\_torsion\_atom\_site\_label\_4  
\_geom\_torsion  
\_geom\_torsion\_site\_symmetry\_1  
\_geom\_torsion\_site\_symmetry\_2  
\_geom\_torsion\_site\_symmetry\_3  
\_geom\_torsion\_site\_symmetry\_4  
\_geom\_torsion\_publ\_flag  
N3 Ru1 P2 C19 -55.89(12) . . . . ?  
N2 Ru1 P2 C19 129.42(12) . . . . ?  
C53 Ru1 P2 C19 -150.91(12) . . . . ?  
N1 Ru1 P2 C19 52.75(11) . . . . ?  
P1 Ru1 P2 C19 149.8(3) . . . . ?  
N3 Ru1 P2 C31 -175.28(13) . . . . ?  
N2 Ru1 P2 C31 10.03(12) . . . . ?  
C53 Ru1 P2 C31 89.70(13) . . . . ?  
N1 Ru1 P2 C31 -66.64(12) . . . . ?  
P1 Ru1 P2 C31 30.4(3) . . . . ?

N3 Ru1 P2 C25 61.77(13) . . . . ?  
N2 Ru1 P2 C25 -112.92(13) . . . . ?  
C53 Ru1 P2 C25 -33.25(13) . . . . ?  
N1 Ru1 P2 C25 170.41(13) . . . . ?  
P1 Ru1 P2 C25 -92.5(3) . . . . ?  
N3 Ru1 P1 C1 102.06(13) . . . . ?  
N2 Ru1 P1 C1 -83.24(13) . . . . ?  
C53 Ru1 P1 C1 -162.90(13) . . . . ?  
N1 Ru1 P1 C1 -6.67(12) . . . . ?  
P2 Ru1 P1 C1 -103.7(3) . . . . ?  
N3 Ru1 P1 C7 -134.65(14) . . . . ?  
N2 Ru1 P1 C7 40.05(13) . . . . ?  
C53 Ru1 P1 C7 -39.60(14) . . . . ?  
N1 Ru1 P1 C7 116.62(13) . . . . ?  
P2 Ru1 P1 C7 19.6(3) . . . . ?  
N3 Ru1 P1 C14 -14.30(14) . . . . ?  
N2 Ru1 P1 C14 160.40(13) . . . . ?  
C53 Ru1 P1 C14 80.74(13) . . . . ?  
N1 Ru1 P1 C14 -123.03(13) . . . . ?  
P2 Ru1 P1 C14 140.0(3) . . . . ?  
N3 Ru1 N2 C51 -1.0(10) . . . . ?  
C53 Ru1 N2 C51 2.93(19) . . . . ?  
N1 Ru1 N2 C51 -179.0(2) . . . . ?  
P2 Ru1 N2 C51 91.49(19) . . . . ?  
P1 Ru1 N2 C51 -86.95(19) . . . . ?  
N3 Ru1 N2 C37 -178.0(9) . . . . ?  
C53 Ru1 N2 C37 -174.1(2) . . . . ?  
N1 Ru1 N2 C37 4.03(18) . . . . ?  
P2 Ru1 N2 C37 -85.52(18) . . . . ?  
P1 Ru1 N2 C37 96.04(18) . . . . ?  
N2 Ru1 N3 O1 20(3) . . . . ?  
C53 Ru1 N3 O1 16(3) . . . . ?  
N1 Ru1 N3 O1 -162(3) . . . . ?  
P2 Ru1 N3 O1 -73(3) . . . . ?  
P1 Ru1 N3 O1 105(3) . . . . ?  
N3 Ru1 N1 C44 -4.4(3) . . . . ?  
N2 Ru1 N1 C44 175.4(3) . . . . ?  
C53 Ru1 N1 C44 180.0(2) . . . . ?  
P2 Ru1 N1 C44 -95.8(2) . . . . ?  
P1 Ru1 N1 C44 88.7(2) . . . . ?  
N3 Ru1 N1 C45 175.79(17) . . . . ?  
N2 Ru1 N1 C45 -4.41(17) . . . . ?  
C53 Ru1 N1 C45 0.2(3) . . . . ?  
P2 Ru1 N1 C45 84.43(17) . . . . ?  
P1 Ru1 N1 C45 -91.13(17) . . . . ?  
N3 Ru1 C53 C46 176.92(19) . . . . ?

N2 Ru1 C53 C46 -2.72(18) . . . . ?  
N1 Ru1 C53 C46 -7.3(3) . . . . ?  
P2 Ru1 C53 C46 -91.70(18) . . . . ?  
P1 Ru1 C53 C46 84.45(18) . . . . ?  
N3 Ru1 C53 C50 -4.0(2) . . . . ?  
N2 Ru1 C53 C50 176.3(3) . . . . ?  
N1 Ru1 C53 C50 171.8(2) . . . . ?  
P2 Ru1 C53 C50 87.4(2) . . . . ?  
P1 Ru1 C53 C50 -96.5(2) . . . . ?  
C7 P1 C1 C2 -19.1(3) . . . . ?  
C14 P1 C1 C2 -127.8(3) . . . . ?  
Ru1 P1 C1 C2 108.9(3) . . . . ?  
C7 P1 C1 C6 164.1(2) . . . . ?  
C14 P1 C1 C6 55.5(3) . . . . ?  
Ru1 P1 C1 C6 -67.8(3) . . . . ?  
C44 N1 C45 C41 3.6(4) . . . . ?  
Ru1 N1 C45 C41 -176.6(2) . . . . ?  
C44 N1 C45 C37 -175.6(2) . . . . ?  
Ru1 N1 C45 C37 4.3(3) . . . . ?  
C31 P2 C19 C20 133.3(3) . . . . ?  
C25 P2 C19 C20 -113.2(3) . . . . ?  
Ru1 P2 C19 C20 10.9(3) . . . . ?  
C31 P2 C19 C24 -50.4(3) . . . . ?  
C25 P2 C19 C24 63.1(3) . . . . ?  
Ru1 P2 C19 C24 -172.8(2) . . . . ?  
C50 C53 C46 C47 1.7(4) . . . . ?  
Ru1 C53 C46 C47 -179.1(2) . . . . ?  
C50 C53 C46 C51 -176.8(2) . . . . ?  
Ru1 C53 C46 C51 2.4(3) . . . . ?  
C51 N2 C37 C38 -1.0(4) . . . . ?  
Ru1 N2 C37 C38 175.9(2) . . . . ?  
C51 N2 C37 C45 -180.0(2) . . . . ?  
Ru1 N2 C37 C45 -3.1(3) . . . . ?  
N1 C45 C37 C38 179.9(3) . . . . ?  
C41 C45 C37 C38 0.7(4) . . . . ?  
N1 C45 C37 N2 -1.0(3) . . . . ?  
C41 C45 C37 N2 179.8(2) . . . . ?  
C1 P1 C7 C9 59.5(3) . . . . ?  
C14 P1 C7 C9 168.6(3) . . . . ?  
Ru1 P1 C7 C9 -64.8(3) . . . . ?  
C1 P1 C7 C12 -121.7(3) . . . . ?  
C14 P1 C7 C12 -12.7(3) . . . . ?  
Ru1 P1 C7 C12 113.9(3) . . . . ?  
C19 P2 C31 C36 -26.6(3) . . . . ?  
C25 P2 C31 C36 -135.3(3) . . . . ?  
Ru1 P2 C31 C36 98.9(2) . . . . ?



C19 P2 C31 C32 160.4(2) . . . . ?  
 C25 P2 C31 C32 51.7(3) . . . . ?  
 Ru1 P2 C31 C32 -74.1(3) . . . . ?  
 C1 P1 C14 C15 -155.8(3) . . . . ?  
 C7 P1 C14 C15 91.8(3) . . . . ?  
 Ru1 P1 C14 C15 -35.7(3) . . . . ?  
 C1 P1 C14 C13 27.8(4) . . . . ?  
 C7 P1 C14 C13 -84.6(3) . . . . ?  
 Ru1 P1 C14 C13 147.9(3) . . . . ?  
 C13 C14 C15 C17 1.3(5) . . . . ?  
 P1 C14 C15 C17 -175.2(3) . . . . ?  
 C12 C7 C9 C8 1.3(5) . . . . ?  
 P1 C7 C9 C8 -179.9(3) . . . . ?  
 C2 C1 C6 C5 -1.5(5) . . . . ?  
 P1 C1 C6 C5 175.4(3) . . . . ?  
 C14 C15 C17 C16 -0.1(6) . . . . ?  
 C7 C9 C8 C10 -0.3(6) . . . . ?  
 C9 C7 C12 C11 -1.5(6) . . . . ?  
 P1 C7 C12 C11 179.7(4) . . . . ?  
 C3 C4 C5 C6 -0.1(7) . . . . ?  
 C1 C6 C5 C4 0.5(6) . . . . ?  
 C15 C14 C13 C18 -1.9(7) . . . . ?  
 P1 C14 C13 C18 174.6(4) . . . . ?  
 C6 C1 C2 C3 2.1(6) . . . . ?  
 P1 C1 C2 C3 -174.6(4) . . . . ?  
 C9 C8 C10 C11 -0.4(7) . . . . ?  
 C15 C17 C16 C18 -0.5(7) . . . . ?  
 C7 C12 C11 C10 0.8(8) . . . . ?  
 C8 C10 C11 C12 0.2(9) . . . . ?  
 C5 C4 C3 C2 0.7(8) . . . . ?  
 C1 C2 C3 C4 -1.7(8) . . . . ?  
 C17 C16 C18 C13 -0.1(9) . . . . ?  
 C14 C13 C18 C16 1.3(9) . . . . ?  
 C19 P2 C25 C26 66.2(3) . . . . ?  
 C31 P2 C25 C26 177.0(3) . . . . ?  
 Ru1 P2 C25 C26 -59.0(3) . . . . ?  
 C19 P2 C25 C30 -113.1(3) . . . . ?  
 C31 P2 C25 C30 -2.4(4) . . . . ?  
 Ru1 P2 C25 C30 121.6(3) . . . . ?  
 C20 C19 C24 C23 -0.4(5) . . . . ?  
 P2 C19 C24 C23 -176.9(3) . . . . ?  
 C32 C31 C36 C35 -0.7(5) . . . . ?  
 P2 C31 C36 C35 -173.9(3) . . . . ?  
 C24 C19 C20 C21 1.0(5) . . . . ?  
 P2 C19 C20 C21 177.4(3) . . . . ?  
 C19 C24 C23 C22 -0.7(6) . . . . ?

C36 C31 C32 C33 1.2(5) . . . . ?  
P2 C31 C32 C33 174.3(3) . . . . ?  
C19 C20 C21 C22 -0.5(5) . . . . ?  
C24 C23 C22 C21 1.3(6) . . . . ?  
C20 C21 C22 C23 -0.7(6) . . . . ?  
C31 C32 C33 C34 -0.4(5) . . . . ?  
C31 C36 C35 C34 -0.5(6) . . . . ?  
C32 C33 C34 C35 -0.8(6) . . . . ?  
C36 C35 C34 C33 1.3(6) . . . . ?  
C26 C25 C30 C29 0.9(7) . . . . ?  
P2 C25 C30 C29 -179.7(4) . . . . ?  
C30 C25 C26 C27 -1.0(6) . . . . ?  
P2 C25 C26 C27 179.6(3) . . . . ?  
C29 C28 C27 C26 0.0(8) . . . . ?  
C25 C26 C27 C28 0.6(7) . . . . ?  
C27 C28 C29 C30 -0.1(9) . . . . ?  
C25 C30 C29 C28 -0.4(9) . . . . ?  
N2 C37 C38 C39 -178.3(3) . . . . ?  
C45 C37 C38 C39 0.7(4) . . . . ?  
C45 N1 C44 C43 -0.7(4) . . . . ?  
Ru1 N1 C44 C43 179.5(2) . . . . ?  
C42 C43 C44 N1 -1.9(5) . . . . ?  
C37 C38 C39 C40 -0.3(5) . . . . ?  
C38 C39 C40 C41 -1.5(6) . . . . ?  
C38 C39 C40 N4 178.2(3) . . . . ?  
C44 C43 C42 C41 1.7(5) . . . . ?  
C43 C42 C41 C45 1.0(5) . . . . ?  
C43 C42 C41 C40 178.4(3) . . . . ?  
N1 C45 C41 C42 -3.7(4) . . . . ?  
C37 C45 C41 C42 175.4(3) . . . . ?  
N1 C45 C41 C40 178.6(3) . . . . ?  
C37 C45 C41 C40 -2.3(4) . . . . ?  
C39 C40 C41 C42 -174.7(3) . . . . ?  
N4 C40 C41 C42 5.7(5) . . . . ?  
C39 C40 C41 C45 2.7(5) . . . . ?  
N4 C40 C41 C45 -176.9(3) . . . . ?  
C39 C40 N4 O2 22.2(6) . . . . ?  
C41 C40 N4 O2 -158.1(4) . . . . ?  
C39 C40 N4 O3 -152.8(5) . . . . ?  
C41 C40 N4 O3 26.8(6) . . . . ?  
C53 C46 C47 C48 0.0(4) . . . . ?  
C51 C46 C47 C48 178.5(3) . . . . ?  
C46 C47 C48 C49 -2.4(5) . . . . ?  
C46 C47 C48 N6 177.4(3) . . . . ?  
C50 C49 C48 C47 2.8(5) . . . . ?  
C50 C49 C48 N6 -177.0(3) . . . . ?

C48 C49 C50 C53 -0.9(4) . . . . ?  
C46 C53 C50 C49 -1.3(4) . . . . ?  
Ru1 C53 C50 C49 179.7(2) . . . . ?  
C37 N2 C51 O4 -4.4(4) . . . . ?  
Ru1 N2 C51 O4 178.7(2) . . . . ?  
C37 N2 C51 C46 174.5(2) . . . . ?  
Ru1 N2 C51 C46 -2.4(3) . . . . ?  
C47 C46 C51 O4 0.4(4) . . . . ?  
C53 C46 C51 O4 178.9(3) . . . . ?  
C47 C46 C51 N2 -178.6(3) . . . . ?  
C53 C46 C51 N2 -0.1(3) . . . . ?  
C47 C48 N6 O9 1.3(6) . . . . ?  
C49 C48 N6 O9 -178.9(4) . . . . ?  
C47 C48 N6 O10 -178.1(4) . . . . ?  
C49 C48 N6 O10 1.7(5) . . . . ?

\_diffn\_measured\_fraction\_theta\_max 0.993  
\_diffn\_reflns\_theta\_full 28.34  
\_diffn\_measured\_fraction\_theta\_full 0.993  
\_refine\_diff\_density\_max 1.200  
\_refine\_diff\_density\_min -1.082  
\_refine\_diff\_density\_rms 0.115

#===== END
